1 **Running title:** Nitrate supply increases nitric oxide synthesis in sugarcane

2

3 **Enhanced nitric oxide synthesis through nitrate supply improves drought**  
4 **tolerance of sugarcane plants**

5

6 Maria D. Pissolato<sup>1</sup>, Neidiquele M. Silveira<sup>2</sup>, Paula J. Prativiera<sup>2</sup>,  
7 Eduardo C. Machado<sup>2</sup>, Amedea B. Seabra<sup>3</sup>, Milena T. Pelegrino<sup>3</sup>,  
8 Ladaslav Sodek<sup>1</sup>, Rafael V. Ribeiro<sup>1\*</sup>

9

10 *<sup>1</sup>Department of Plant Biology, Institute of Biology, University of Campinas*  
11 *(UNICAMP), P.O. Box 6109, 13083-970, Campinas SP, Brazil.*

12

13 *<sup>2</sup>Laboratory of Plant Physiology “Coaracy M. Franco”, Center for Research &*  
14 *Development in Ecophysiology and Biophysics, Agronomic Institute (IAC), P.O.*  
15 *Box 28, 13012-970, Campinas SP, Brazil.*

16

17 *<sup>3</sup>Center for Natural and Human Sciences (CCNH), Federal University of ABC*  
18 *(UFABC), P.O. Box 09210-580, Santo André SP, Brazil.*

19

20 *\*Corresponding author: [rvr@unicamp.br](mailto:rvr@unicamp.br)*

21 **Highlights**

22

23 • Nitrate supply improves sugarcane growth under water deficit.

24

25 • Nitrate supply stimulated nitrate reductase activity and NO synthesis in  
26 sugarcane roots facing water deficit.

27

28 • Leaf gas exchange was increased by nitrate supply as well as root  
29 growth under water limiting conditions.

30

31 • Antioxidant responses were also improved in plants supplied exclusively  
32 with nitrate.

33

34 • Nitrogen management may be an interesting strategy for improving  
35 drought tolerance in sugarcane fields.

36 **Abstract**

37

38 Nitric oxide (NO) is an important signaling molecule associated with many  
39 biochemical and physiological processes in plants under stressful conditions.  
40 Nitrate reductase (NR) not only mediates the reduction of  $\text{NO}_3^-$  to  $\text{NO}_2^-$  but also  
41 reduces  $\text{NO}_2^-$  to NO, a relevant pathway for NO production in higher plants.  
42 Herein, we hypothesized that sugarcane plants supplied with more  $\text{NO}_3^-$  as a  
43 source of N would produce more NO under water deficit. Such NO would  
44 reduce oxidative damage and favor photosynthetic metabolism and growth  
45 under water limiting conditions. Sugarcane plants were grown in nutrient  
46 solution and received the same amount of nitrogen, with varying  
47 nitrate:ammonium ratios (100:0 and 70:30). Plants were then grown under well-  
48 watered or water deficit conditions, in which the osmotic potential of nutrient  
49 solution was -0.15 and -0.75 MPa, respectively. Under water deficit, plants  
50 exhibited higher root  $[\text{NO}_3^-]$  and  $[\text{NO}_2^-]$  when supplied with 100%  $\text{NO}_3^-$ .  
51 Accordingly, the same plants also showed higher root NR activity and root NO  
52 production. We also found higher photosynthetic rates and stomatal  
53 conductance in plants supplied with more  $\text{NO}_3^-$ , which improved root growth.  
54 ROS accumulation was reduced due to increases in the activity of catalase in  
55 leaves and superoxide dismutase and ascorbate peroxidase in roots of plants  
56 supplied with 100%  $\text{NO}_3^-$  and facing water deficit. Such positive responses to  
57 water deficit were offset when a NO scavenger was supplied to the plants, thus  
58 confirming that increases in leaf gas exchange and plant growth were induced  
59 by NO. Concluding,  $\text{NO}_3^-$  supply is an interesting strategy for alleviating the  
60 negative effects of water deficit on sugarcane plants, increasing drought  
61 tolerance through enhanced NO production. Our data also provide insights on  
62 how plant nutrition could improve crop tolerance against abiotic stresses, such  
63 as drought.

64

65 **Keywords:** Nitrate reductase, Photosynthesis, Plant growth, Reactive oxygen  
66 species, S-nitrosylation, Water deficit.

## 67 Introduction

68

69 Nitric oxide (NO) is a diatomic radical gas and important signaling  
70 molecule in animals (Bogdan, 2015), fungi (Canovas *et al.*, 2016), bacteria  
71 (Crane *et al.*, 2010) and plants (Mur *et al.*, 2013). In plants, increasing evidence  
72 indicates NO as a key component of the signaling network, controlling  
73 numerous physiological and metabolic processes such as seed germination  
74 (Albertos *et al.*, 2015), flowering (He *et al.*, 2004), root growth (Fernandez-  
75 Marcos *et al.*, 2011), respiration, stomatal conductance (Moreau *et al.*, 2010;  
76 Wang *et al.*, 2015) and adaptive responses to biotic and abiotic stresses (Shan  
77 *et al.*, 2015; Fatma, *et al.*, 2016).

78 NO synthesis is increased in plants under drought and its role in  
79 promoting adaptive responses to cope with water deficit has been suggested  
80 (Cai *et al.*, 2015; Silveira *et al.*, 2017a). NO and NO-derived molecules play a  
81 critical role in intracellular redox signaling and in the activation of antioxidant  
82 defense mechanisms (Shi *et al.*, 2014; Hatamzadeh *et al.*, 2015; Silveira *et al.*,  
83 2015). For example, NO supply conferred drought tolerance to wheat seedlings,  
84 reducing membrane damage (Garcia-Mata and Lamattina, 2001). Spraying S-  
85 nitrosogluthatione (GSNO) – a NO donor – on sugarcane plants resulted in  
86 higher photosynthesis under drought, promoting plant growth under stressful  
87 condition (Silveira *et al.*, 2016).

88 The protective action of exogenous NO donors has been attributed to the  
89 elimination of superoxide ( $O_2^{\bullet-}$ ) and enhancement of the antioxidant system in  
90 sugarcane plants under drought (Silveira *et al.*, 2017b). In addition, one of the  
91 main downstream effects of NO is the post-translational regulation involving  
92 thiols (Hancock and Neill, 2019). S-nitrosylation is a redox modification  
93 consisting in the reversible attachment of NO to the thiol group of a cysteine  
94 residue in a target protein leading to the formation S-nitrosothiols (SNOs)  
95 (Astier *et al.*, 2012; Fancy *et al.*, 2016). Then, S-nitrosylation may cause a  
96 conformational change in proteins, changing their activity or function. On the  
97 other hand, NO can react with reduced glutathione (GSH), producing S-  
98 nitrosogluthatione (GSNO) – an endogenous NO reservoir and an efficient NO  
99 donor (Jahnová *et al.*, 2019).

100 While the mechanisms of NO synthesis in animals have been well  
101 documented, NO synthesis and its regulation in plants are complex and poorly  
102 understood. In animals, NO is bio-synthesized through NO synthase (NOS),  
103 which oxidizes *L*-arginine and produces *L*-citrulline and NO (Alderton *et al.*,  
104 2001). Although some evidence indicates the presence of NOS-like activity in  
105 many plant species, genes encoding NOS have not yet been identified in higher  
106 plants (Hancock and Neill, 2014; Santolini *et al.*, 2017; Hancock and Neill,  
107 2019). NO production in plant species and under diverse biological conditions  
108 point to the co-existence of multiple pathways, likely functioning in distinct  
109 tissues/organs and subcellular compartments (León and Costa-Broséta, 2019).

110 One of the most important pathways for NO production in land plants is  
111 through nitrate reductase (NR) (Gupta *et al.*, 2011; Fancy *et al.*, 2016; Chamizo-  
112 Ampudia *et al.*, 2017; León and Costa-Broséta, 2019), a multifunctional enzyme  
113 that catalyzes  $\text{NO}_3^-$  reduction to  $\text{NO}_2^-$ , which is then reduced to  $\text{NH}_4^+$  during  
114 the N assimilatory pathway (Heidari *et al.*, 2011). Arasimowicz-Jelonek *et al.*  
115 (2009) reported low NO concentration in cucumber seedlings treated with a NR  
116 inhibitor, suggesting its role in NO synthesis. In rice roots, NO production  
117 through NR was increased in response to  $\text{NO}_3^-$  supply (Sun *et al.*, 2015).  
118 Furthermore, low NO production by *Physcomitrella patens* occurred when  
119 plants received a NR inhibitor (Andrés *et al.*, 2015). Although there are data  
120 supporting the association between NR activity and NO production in plants  
121 (Mur *et al.*, 2013), some authors have argued that NO production through NR  
122 represents only a small fraction (1-2%) of total  $\text{NO}_3^-$  reduction (Yamasaki *et al.*,  
123 1999; Rockel *et al.*, 2002). However, the role of such a NO production pathway  
124 and its sensitivity to small changes in  $\text{NO}_3^-$  supply in plants under water deficit  
125 remain unknown.

126 Nitrogen is the most influential plant nutrient in sugarcane cultivation  
127 (Meyer *et al.*, 2007). Nitrate ( $\text{NO}_3^-$ ), ammonium ( $\text{NH}_4^+$ ), and urea ( $\text{CO}(\text{NH}_2)_2$ )  
128 are the main forms of fertilizers and, thus, are the main sources of N for crops  
129 (Esteban *et al.*, 2016). Some crops have a preference for  $\text{NH}_4^+$  uptake (Malagoli  
130 *et al.*, 2000), but most studies have reported stress symptoms associated with  
131  $\text{NH}_4^+$  toxicity (Barreto *et al.*, 2018; Boschiero *et al.*, 2019). While Robinson *et al.*  
132 (2011) reported the sugarcane preference for  $\text{NH}_4^+$ , Pissolato *et al.* (2019)  
133 found that increasing  $\text{NH}_4^+$  supply causes biomass reduction and

134 photosynthesis impairment of sugarcane plants. Changing the N source,  $\text{NO}_3^-$   
135 supply has been shown to increase the tolerance to abiotic stresses in maize  
136 (Rios-Gonzalez *et al.*, 2002; Zhang *et al.*, 2012), wheat (Speer *et al.*, 1994), pea  
137 (Frechilla *et al.*, 2001), *Populus simonii* (Meng *et al.*, 2016) and grass species  
138 (Wang and Macko, 2011).

139 The literature concerning  $\text{NO}_3^-$  supply and stress tolerance, taken  
140 together, led us to hypothesize that the increased plant performance under  
141 limiting conditions could be related to NO production through NR activity. Here,  
142 our aim was to test the hypothesis that sugarcane plants that receive  $\text{NO}_3^-$  and  
143 no  $\text{NH}_4^+$  as sources of nitrogen will have higher NR activity and thereby produce  
144 more NO, compared to plants receiving the same amount of nitrogen but as a  
145 mixture of  $\text{NO}_3^-$  (70%) and  $\text{NH}_4^+$  (30%). As a consequence of NO production,  
146 oxidative damage will be reduced under water deficit, favoring photosynthetic  
147 metabolism and plant growth.

148

## 149 **Materials and Methods**

150

### 151 *Plant material and growth conditions*

152

153 Pre-sprouted sugarcane seedlings (*Saccharum* spp.) cv. IACSP95-5000  
154 developed by the Sugarcane Breeding Program of the Agronomic Institute  
155 (ProCana, IAC, Brazil) were used. Six-week-old plants were transferred to  
156 plastic boxes (4 L) containing nutrient solution modified from De Armas *et al.*  
157 (1992): 5 mmol L<sup>-1</sup> N (nitrate 90% + ammonium 10%); 9 mmol L<sup>-1</sup> Ca; 0.5 mmol  
158 L<sup>-1</sup> Mg; 1.2 mmol L<sup>-1</sup> P; 1.2 mmol L<sup>-1</sup> S; 24 μmol L<sup>-1</sup> B; 16 μmol L<sup>-1</sup> Fe; 9 μmol L<sup>-1</sup>  
159 Mn; 3.5 μmol L<sup>-1</sup> Zn; 1 μmol L<sup>-1</sup> Cu; and 0.1 μmol L<sup>-1</sup> Mo. Plants received this  
160 solution for two weeks until the establishment of treatments and the nutrient  
161 solution was renewed every three days throughout the experimental period.

162 Electrical conductivity of nutrient solution was maintained between 1.8  
163 and 2.0 mS cm<sup>-1</sup> and pH at 5.9±0.1. The pH was adjusted daily with 0.5 M  
164 ascorbic acid or 0.5 M NaOH. Both variables were monitored on a daily basis  
165 using a portable electrical conductivity meter (mCA 150P, MS Tecnopon  
166 Instrumentação, Piracicaba SP, Brazil) and a portable pH meter (mPA 210P,  
167 MS Tecnopon Instrumentação, Piracicaba SP, Brazil), respectively. The nutrient

168 solution volume was also checked daily and completed with water when  
169 necessary. The nutrient solution was aerated continuously by using an air  
170 compressor (Master Super II, Master, São Paulo SP, Brazil).

171 The experiment was carried in a growth chamber (Instalafrio, Brazil), with  
172 a 12 h photoperiod, air temperature of 30/20 °C (day/night), air relative humidity  
173 of 80% and photosynthetic photon flux density (PPFD) about 800  $\mu\text{mol m}^{-2} \text{s}^{-1}$ .

174

175 *Experiment I: Inducing NO production under water deficit through nitrate supply*

176

177 Our previous study revealed that sugarcane plants can be supplied with  
178 30%  $\text{NH}_4^+$  in nutrient solution without compromising their photosynthesis and  
179 growth (Pissolato *et al.*, 2019). Thus, the  $\text{NO}_3^-:\text{NH}_4^+$  ratios 100:0 and 70:30  
180 were chosen to represent the treatments with more and less  $\text{NO}_3^-$ , while  
181 supplying the same amount of nitrogen and avoiding  $\text{NH}_4^+$  toxicity. Plants were  
182 also subjected to varying water availability, according to the osmotic potential of  
183 nutrient solution: -0.15 MPa (reference, well-hydrated); and -0.75 MPa (water  
184 deficit, WD). The water deficit was induced by adding polyethylene glycol  
185 (Carbowax<sup>TM</sup> PEG-8000, Dow Chemical Comp, Midland MI, USA) to the  
186 nutrient solution, seven days after imposing  $\text{NO}_3^-:\text{NH}_4^+$  ratios. To prevent  
187 osmotic shock, PEG-8000 was gradually added to the nutrient solution,  
188 reducing the osmotic potential of the solution by -0.20 MPa per day, i.e. -0.75  
189 MPa was reached after three days (3<sup>th</sup> day of the experiment). Plants were  
190 allowed to recover from water deficit after returning them to control conditions  
191 on the 7<sup>th</sup> day of the experiment. They remained for 4 days under such  
192 conditions, when the experiment ended. For the biochemical analyses, leaf and  
193 root samplings were collected at the maximum water deficit (7<sup>th</sup> day) and at the  
194 end of the recovery period (11<sup>th</sup> day). Samples were collected, immediately  
195 immersed in liquid nitrogen and then stored at -80 °C.

196

197 *Leaf gas exchange*

198

199 Gas exchange and chlorophyll fluorescence of the first fully expanded  
200 leaf with visible ligule were measured throughout the experimental period using  
201 an infrared gas analyzer (Li-6400, Licor, Lincoln NE, USA) equipped with a

202 modulated fluorometer (6400-40 LCF, Licor, Lincoln NE, USA). Leaf CO<sub>2</sub>  
203 assimilation ( $A_n$ ), stomatal conductance ( $g_s$ ) and the effective quantum  
204 efficiency of photosystem II ( $\square_{PSII}$ ) were measured under PPFD of 2000  $\mu\text{mol m}^{-2}$   
205  $\text{s}^{-1}$  and air CO<sub>2</sub> concentration of 400  $\mu\text{mol mol}^{-1}$ . The measurements were  
206 performed between 10:30 and 12:30 h, as carried out previously (Pissolato *et*  
207 *al.*, 2019). The vapor pressure difference between leaf and air (VPDL) was  
208  $2.1 \pm 0.2$  kPa and leaf temperature was  $30 \pm 0.4$  °C during the evaluations.

209

#### 210 *Chlorophyll content and leaf relative water content (RWC)*

211

212 A chlorophyll meter (CFL 1030, Falker, Porto Alegre RS, Brazil) was  
213 used to assess the relative chlorophyll content (Chl). The relative water content  
214 was calculated using the fresh (FW), turgid (TW) and dry (DW) weights of leaf  
215 discs according to Jamaux *et al.* (1997):  $\text{RWC} = 100 \times [(\text{FW} - \text{DW}) / (\text{TW} - \text{DW})]$ .  
216 Measurements were taken at the maximum water deficit (7<sup>th</sup> day), and four days  
217 after returning plants to the control condition (recovery period, 11<sup>th</sup> day).

218

#### 219 *Photosynthetic enzymes*

220

221 The activity of ribulose-1,5-bisphosphate carboxylase/oxygenase  
222 (Rubisco, EC 4.1.1.39) was quantified in approximately 200 mg of leaves, which  
223 were macerated and homogenized in 100 mM bicine-NaOH buffer (pH 7.8), 1  
224 mM ethylenediaminetetraacetic (EDTA), 5 mM MgCl<sub>2</sub>, 5 mM dithiothreitol (DTT),  
225 1 mM phenylmethylsulfonyl fluoride (PMSF) and 10  $\mu\text{M}$  leupeptin. The resulting  
226 solution was centrifuged at 14.000  $g$  for 5 min at 4 °C. An aliquot of leaf extract  
227 was incubated with the reaction medium containing 100 mM bicine-NaOH (pH  
228 8.0) 10 mM NaHCO<sub>3</sub>, 20 mM MgCl<sub>2</sub>, 3.5 mM ATP, 5 mM phosphocreatine, 0.25  
229 mM NADH, 80 nkat glyceraldehyde-3-phosphate dehydrogenase, 80 nkat 3-  
230 phosphoglyceric phosphokinase and 80 nkat creatine phosphokinase, for 10  
231 min at 25 °C. The oxidation of NADH was initiated by adding 0.5 mM ribulose-  
232 1,5-bisphosphate (RuBP) and total Rubisco activity was measured. The  
233 reduction of absorbance at 340 nm was monitored for 3 min (Sage *et al.*, 1988;  
234 Reid *et al.*, 1997).



235 The activity of phosphoenolpyruvate carboxylase (PEPC, EC 4.1.1.31)  
236 was also evaluated in approximately 200 mg of leaves, which were macerated  
237 and homogenized in 100 mM potassium phosphate buffer (pH 7), 1 mM EDTA,  
238 1 mM PMSF and centrifuged at 14.000 g for 25 min at 4 °C. The supernatant  
239 was collected and the reaction medium for PEPC activity contained 50 mM Tris-  
240 HCl buffer (pH 7.8), 5 mM MgCl<sub>2</sub>, 5 mM glucose 6-phosphate, 10 mM NaHCO<sub>3</sub>,  
241 33 nkat malic dehydrogenase and 0.3 mM NADH. The reaction was initiated by  
242 adding 4 mM phosphoenolpyruvate at 30 °C. The oxidation of NADH was  
243 monitored at 340 nm for 1 min (Degl'innocenti *et al.*, 2002).

244 Proteins were extracted from leaf samples with extraction buffer  
245 composed of 100 mM Tris, 1 mM EDTA, 5 mM DTT, 1 mM PMSF and  
246 separated by SDS-PAGE (Laemmli, 1970). The first gel was stained with  
247 Coomassie Brilliant Blue and the second was used for Western blot. SDS-PAGE  
248 electrophoresis was performed with equal amounts of protein per lane. Soluble  
249 proteins were denatured using SDS and they were electrophoretically  
250 transferred to a nitrocellulose membrane (Towbin *et al.*, 1979). PEPC and  
251 Rubisco protein abundances were measured by detection of the PEPC subunit  
252 and Rubisco large subunit (RLS) using specific polyclonal antibodies (Agrisera  
253 Co, Sweden) according to the manufacturer's instructions.

254

### 255 *Reactive oxygen species*

256

257 The concentration of the superoxide anion (O<sub>2</sub><sup>•-</sup>) was determined in 50  
258 mg of fresh tissue incubated in an extraction medium consisting of 100 μM  
259 EDTA, 20 μM NADH, and 20 mM sodium phosphate buffer, pH 7.8. The  
260 reaction was initiated by adding 25.2 mM epinephrine in 0.1 N HCl. The  
261 samples were incubated at 28 °C under stirring for 5 min and the absorbance  
262 was read at 480 nm over a further 5 min (Mohammadi and Karr, 2001). O<sub>2</sub><sup>•-</sup>  
263 production was assessed by the accumulation of adrenochrome using a molar  
264 extinction coefficient of 4.0×10<sup>3</sup> M<sup>-1</sup> cm<sup>-1</sup> (Boveris, 1984).

265 The quantification of hydrogen peroxide (H<sub>2</sub>O<sub>2</sub>) was performed following  
266 Alexieva *et al.* (2001). Homogenates were obtained from 100 mg of fresh tissue  
267 ground in liquid nitrogen with the addition of polyvinylpyrrolidone (PVPP)  
268 and 0.1% of trichloroacetic acid (TCA) solution (w/v). The extract was

269 centrifuged at 10.000 g and 4 °C for 15 min. The reaction medium consisted of  
270 1 mM KI, 0.1 M potassium phosphate buffer (pH 7.5) and crude extract. The  
271 microtubes were left on ice in the dark for 1 h. After this period, the absorbance  
272 was read at 390 nm. A standard curve was obtained with H<sub>2</sub>O<sub>2</sub> and the results  
273 were expressed as  $\mu\text{mol H}_2\text{O}_2 \text{ g}^{-1} \text{ FW}$ .

274

#### 275 *Lipid peroxidation*

276

277 The concentration of malondialdehyde (MDA) was measured and used  
278 as a proxy of lipid peroxidation. 200 mg of fresh tissue were macerated in  
279 extraction medium containing 0.1% TCA (w/v) and centrifuged at 10.000 g for  
280 15 min. The supernatant was added to 0.5% thiobarbituric acid (w/v) in 20%  
281 TCA (w/v), and the mixture incubated at 95 °C for 20 min (Cakmak and Horst,  
282 1991). After this time, the reaction was stopped in an ice bath. Then a new  
283 centrifugation was performed at 10.000 g for 10 min, and after 30 min at room  
284 temperature the absorbance was read at 532 and 600 nm and the non-specific  
285 absorbance at 600 nm was discounted. The MDA concentration was calculated  
286 using an extinction coefficient of  $155 \text{ mM}^{-1} \text{ cm}^{-1}$  (Heath and Packer, 1968) and  
287 results were expressed as  $\text{nmol MDA g}^{-1} \text{ FW}$

288

#### 289 *Antioxidant activity and protein extraction*

290

291 The crude enzymatic extracts for the determination of superoxide  
292 dismutase activity (SOD), catalase (CAT) and ascorbate peroxidase (APX) were  
293 obtained from 100 mg of plant tissue in specific medium, followed by  
294 centrifugation at 12.000 g for 15 min at 4 °C. The specific medium for CAT and  
295 SOD consisted of 0.1 M potassium phosphate buffer (pH 6.8), 0.1 mM EDTA, 1  
296 mM PMSF and 1% PVPP, according to Peixoto *et al.* (1999). The specific  
297 medium for APX was composed of 50 mM potassium phosphate buffer (pH  
298 7.0), 1 mM ascorbic acid and 1 mM EDTA (Nakano and Asada, 1981).

299 Superoxide dismutase (SOD, EC 1.15.1.1) activity was determined  
300 according to Giannopolitis and Ries (1977). The crude extract was added to the  
301 reaction medium consisting of 100 mM sodium phosphate buffer (pH 7.8), 50  
302 mM methionine, 5 mM EDTA, deionized water, 100  $\mu\text{M}$  riboflavin and 1 mM

303 nitro blue tetrazolium chloride (NBT). A group of tubes was exposed to light  
304 (fluorescent lamp, 30 W) for 10 min, and another group remained in darkness.  
305 The absorbance was measured at 560 nm and one unit of SOD defined as the  
306 amount of enzyme required to inhibit NBT photoreduction by 50%, and activity  
307 expressed as  $\text{U min}^{-1} \text{mg}^{-1}$  of protein.

308 Catalase (CAT, EC 1.11.1.6) activity was quantified following the  
309 procedure described by Havir and McHale (1987). The crude extract was added  
310 to the reaction medium consisting of 100 mM potassium phosphate buffer (pH  
311 6.8), deionized water and 125 mM  $\text{H}_2\text{O}_2$ . The reaction was carried out in a water  
312 bath at 25 °C for 2 min and CAT activity was assessed by the decrease in  
313 absorbance at 240 nm, using the molar extinction coefficient of  $36 \text{ M}^{-1} \text{cm}^{-1}$  and  
314 expressed activity as  $\text{nmol min}^{-1} \text{mg}^{-1}$  of protein.

315 Ascorbate peroxidase (APX, EC 1.11.1.11) activity was evaluated as  
316 described by Nakano and Asada (1981). The crude extract was added in  
317 reaction medium consisting of 100 mM potassium phosphate buffer (pH 6.8),  
318 deionized water, 10 mM ascorbic acid and 10 mM  $\text{H}_2\text{O}_2$ . The reaction was  
319 carried out at 25 °C for 2 min and APX activity quantified by the decrease in  
320 absorbance at 290 nm, using the molar extinction coefficient of  $2.8 \text{ M}^{-1} \text{cm}^{-1}$   
321 and expressing activity as  $\mu\text{mol min}^{-1} \text{mg}^{-1}$  of protein.

322 The protein levels were determined by the Bradford method (Bradford,  
323 1976), using bovine serum albumin (BSA) as the standard. The extract used for  
324 this analysis was the same as for SOD and CAT enzymes.

325

### 326 *Nitrate, nitrite and ammonium*

327

328 Fresh plant tissue samples (500 mg) were ground in liquid nitrogen and  
329 extraction medium containing methanol:chloroform:water (12:5:3 v/v). After  
330 centrifugation at 2.000 g for 5 min, the supernatants were collected and  
331 chloroform and deionized water were added to them. The mixture was shaken  
332 vigorously and then centrifuged for 3 min at 2.000 g for phase separation. The  
333 upper aqueous phase was collected and maintained in a water bath at 37 °C to  
334 remove traces of chloroform and then the extracts were stored at -20 °C  
335 (Bieleski and Turner, 1966).

336 For nitrate determination, an aliquot of the extract was pipetted into test  
337 tubes containing reaction medium (5% salicylic acid in conc. H<sub>2</sub>SO<sub>4</sub>). After 20  
338 min, 2 N NaOH was added and the solution stirred. After cooling to room  
339 temperature, the absorbance was read in a spectrophotometer at 410 nm and  
340 the nitrate content calculated from a standard curve using KNO<sub>3</sub> (100-1000  
341 nmol) (Cataldo *et al.*, 1975). For nitrite, an aliquot of the extract was added to  
342 1% sulfanilamide solution in 3 N HCl and 0.02% N-naphthyl ethylenediamine  
343 solution. The tubes were allowed to stand for 30 min in the dark at room  
344 temperature. Deionized water was added and nitrite content quantified after  
345 reading the absorbance at 540 nm (Hageman and Reed, 1980). For  
346 ammonium, the extract was added to microtubes, where solution A (1% phenol  
347 and 0.005% sodium nitroprusside) was added and followed by solution B (0.5%  
348 sodium hydroxide containing 2.52% sodium hypochlorite). The tubes were  
349 incubated for 35 min in a water bath at 37 °C and the absorbance read at 625  
350 nm after cooling to room temperature (McCullough, 1967). A standard curve of  
351 (NH<sub>4</sub>)<sub>2</sub>SO<sub>4</sub> was used to estimate the ammonium content.

352

#### 353 *Nitrate reductase (NR) activity*

354

355 Leaf and root nitrate reductase (NR, EC 1.7.1.1) activity was estimated  
356 as the rate of nitrite (NO<sub>2</sub><sup>-</sup>) production (Cambraia *et al.*, 1989). The enzyme  
357 extract was obtained from the macerate of 200 mg of fresh tissue with liquid  
358 nitrogen and homogenized with extraction medium containing 0.1 M tris-HCl  
359 buffer (pH 8.1), 4 mM NiSO<sub>4</sub>, 20 mM reduced glutathione (GSH), deionized  
360 water and 0.5 mM PMSF. Then, the crude extracts were centrifuged at 10.000 *g*  
361 for 10 min at 4 °C and the supernatant was collected and maintained on ice.  
362 The extract was added to the assay medium containing 100 mM Tris-HCl buffer  
363 (pH 7.5), 10 mM KNO<sub>3</sub>, 0.05 mM NADH and triton 1% X-100 (v/v), mixed and  
364 incubated at 30 °C for 10 min. The reaction was quenched by adding 1%  
365 sulfanilamide solution in 1 M HCl and 0.01% N-naphthyl ethylenediamine. Nitrite  
366 production was determined by absorbance at 540 nm using a standard curve  
367 with KNO<sub>2</sub>. The NR activity was expressed as nmol NO<sub>2</sub><sup>-</sup> min<sup>-1</sup> mg<sup>-1</sup> protein.

368

369 *S-nitrosogluthatione reductase (GSNOR) activity*

370

371 Leaf and root S-nitrosogluthatione reductase (GSNOR, EC 1.2.1.1)  
372 activity was determined spectrophotometrically at 25 °C by monitoring the  
373 oxidation of NADH at 340 nm, based on Rodríguez-Ruiz *et al.* (2017). Briefly,  
374 200 mg of fresh tissue were grounded with liquid nitrogen, resuspended in 20  
375 mM HEPES buffer (pH 8.0), 10 mM EDTA, 0.5 mM PMSF and centrifuged for  
376 10 min at 10.000 *g* and 4 °C. The enzyme extract was added in to the assay  
377 medium (20 mM HEPES buffer pH 8.0 and 1.8 mM NADH) at 25 °C, and  
378 maintained in the dark. The reaction was started by adding 4 mM GSNO  
379 (Silveira *et al.*, 2016) and the GSNOR activity followed by NADH oxidation at  
380 340 nm. Activity was calculated using the NADH extinction coefficient (6.22  
381 mM<sup>-1</sup> cm<sup>-1</sup> at 340 nm) and expressed as nmol NADH min<sup>-1</sup> mg<sup>-1</sup> protein.

382

383 *S-nitrosothiols content*

384

385 The total leaf and root proteins were extracted in deionized water and the  
386 resulting homogenate was used to estimate the S-nitrosothiol content through  
387 an amperometer, as described by Santos *et al.* (2016) and Zhang *et al.* (2000).  
388 Measurements were performed with the WPI amperometer TBR 4100/1025  
389 (World Precision Instruments Inc., Sarasota FL, USA) and a specific nitric oxide  
390 (NO) sensor, ISO-NOP (2 mm). Aliquots of aqueous suspension were added to  
391 the sample compartment containing aqueous copper chloride solution (0.1 mol  
392 L<sup>-1</sup>). This condition allowed the detection of free NO released from the S-  
393 nitrosothiols present in the leaf and root protein homogenate. The samples were  
394 run in triplicate and the calibration curve was obtained with newly prepared  
395 GSNO solutions. The data were compared with the standard curve obtained  
396 and normalized against fresh weight. The SNO content was expressed as μmol  
397 NO g<sup>-1</sup> FW.

398

399 *Intracellular NO detection*

400

401 NO was assayed in leaf and root segments. For the roots, it was  
402 collected approximately 1 cm from the middle part of secondary root. For the

403 leaves, a thin cross section was made with the aid of a scalpel. The segments  
404 were incubated in MES-KCl buffer (10 mM MES, 50 mM KCl, 0.1 mM CaCl<sub>2</sub>, pH  
405 6.15), at room temperature for 15 min. Then, these segments were incubated in  
406 solution of 10 μM DAF2-DA, mixing for 40 min in the dark at room temperature  
407 (Desikan *et al.*, 2002; Bright *et al.*, 2009). The samples were washed with buffer  
408 to remove the excess of DAF2-DA, placed onto a glass slide and covered with a  
409 glass slip before observing fluorescence using an inverted confocal microscope  
410 set for excitation at 488 nm and emission at 515 nm (Model Zeiss LSM510, Carl  
411 Zeiss AG, Germany). Photographs were taken with a 10x magnification, 15 s  
412 exposure and 1x gain. Images were analyzed using ImageJ software (NIH,  
413 Bethesda, MD, USA) and data were normalized by subtracting the values of the  
414 negative control (plants well-hydrated) and presented as mean pixel intensities.

415

#### 416 *Biometry*

417

418 Leaf and root dry masses were quantified after drying samples in an  
419 oven (60 °C) with forced-air circulation until constant weight. Leaf area of each  
420 plant was evaluated with a portable leaf area meter (model LI-3000, Li-Cor Inc.,  
421 Lincoln NE, USA).

422

#### 423 *Experiment II: Using cPTIO to offset the benefits of NO in plants under water* 424 *deficit*

425

426 An additional experiment was performed to verify whether the benefits  
427 found in plants supplied with only NO<sub>3</sub><sup>-</sup> and subjected to water deficit were in  
428 fact caused by NO. We used a NO scavenger, 2-(4-carboxyphenyl)-4,4,5,5-  
429 tetramethylimidazoline-1-oxyl-3-oxide (cPTIO). cPTIO is a stable organic radical  
430 developed by Akaike and Maeda (1996), which has been widely used as a  
431 control as it oxidizes the NO molecule to form NO<sub>2</sub>. In plants supplied with only  
432 NO<sub>3</sub><sup>-</sup> as N source, the following treatments were evaluated: (a) well-watered  
433 condition, with an osmotic potential of the nutrient solution of -0.15 MPa; (b)  
434 water deficit, with an osmotic potential of nutrient solution of -0.75 MPa; and (c)  
435 same as b with 100 μM cPTIO.

436 First, plants were moved and roots placed in a moist chamber, where  
437 they were sprayed with cPTIO and remained in the dark for 1 hour. After this  
438 treatment, the plants were returned to the boxes with the original nutrient  
439 solution. This procedure was performed for four consecutive days from the  
440 moment the water deficit (-0.75 MPa) was installed. We also evaluated the  
441 production of intracellular NO, plant biomass, leaf CO<sub>2</sub> assimilation ( $A_n$ ) and  
442 stomatal conductance ( $g_s$ ) as described previously.

443

#### 444 *Experimental design and statistical analyses*

445

446 The experimental design was completely randomized and two causes of  
447 variation were analyzed: water availability and nitrogen source. Data were then  
448 subjected to an analysis of variance (ANOVA) and when statistical significance  
449 was detected, the mean values ( $n=4$ ) were compared by the Tukey test  
450 ( $p<0.05$ ) using the software Assistat version 7.7 (UFMG, Campina Grande PB,  
451 Brazil).

452

## 453 **Results**

454

### 455 *Experiment I: Sugarcane responses to water deficit as affected by NO<sub>3</sub><sup>-</sup> supply*

456

#### 457 *Relative water content and photosynthesis*

458

459 A significant reduction in leaf relative water content was found under  
460 water deficit, as compared to well-watered conditions (Fig. 1d). The relative  
461 chlorophyll content was also reduced at the maximum water deficit, with no  
462 differences induced by NO<sub>3</sub><sup>-</sup> supply (data not shown). Low water availability  
463 also caused a large reduction in leaf CO<sub>2</sub> assimilation ( $A_n$ ); however, plants  
464 supplied with more NO<sub>3</sub><sup>-</sup> exhibited higher photosynthetic rates than those under  
465 NO<sub>3</sub><sup>-</sup>:NH<sub>4</sub><sup>+</sup> 70:30 (Fig. 1a). In addition, those plants showed a faster recovery of  
466  $A_n$  when compared to ones receiving 70% NO<sub>3</sub><sup>-</sup> (Fig. 1a). Similar results were  
467 found for stomatal conductance (Fig. 1b) and effective quantum efficiency of  
468 PSII (Fig. 1b,c). We did not observe any significant difference among  
469 treatments for the PEPC abundance and activity at maximum water deficit



470 (Suppl. Fig. S1a,c). However, both Rubisco abundance and activity were  
471 decreased under water deficit, regardless of the variation in  $\text{NO}_3^-$  supply (Suppl.  
472 Fig. S1b,d).

473

#### 474 *Nitrate and ammonium*

475

476 Leaf  $[\text{NO}_3^-]$  was higher in water-stressed plants as compared to well-  
477 hydrated ones, but no difference was found due to  $\text{NO}_3^-$  supply under low water  
478 availability (Fig. 2a). Root  $[\text{NO}_3^-]$  was significantly higher in plants supplied with  
479 100%  $\text{NO}_3^-$  and subjected to water deficit (Fig. 2b). While leaf  $[\text{NO}_2^-]$  did not  
480 vary among treatments (Fig. 2c), we found the highest root  $[\text{NO}_2^-]$  in plants  
481 supplied with 100%  $\text{NO}_3^-$  under water deficit (Fig. 2d). We did not find  
482 significant changes in leaf and root  $[\text{NH}_4^+]$  due to  $\text{NO}_3^-$  supply, regardless the  
483 water regime (Fig. 2e,f). During the recovery period, both previously stressed  
484 plants and the controls presented similar leaf and root  $[\text{NO}_3^-]$ ,  $[\text{NO}_2^-]$  and  $[\text{NH}_4^+]$   
485 (Fig. 2).

486

#### 487 *Nitrate reductase, S-nitrosoglutathione reductase and S-nitrosothiols*

488

489 Under low water availability, nitrate reductase (NR) activity was higher in  
490 plants supplied with 100%  $\text{NO}_3^-$  than those receiving 70%  $\text{NO}_3^-$ , regardless the  
491 plant organ (Fig. 3a,b). While we did not notice differences among treatments  
492 for leaf NR activity during the recovery period, root NR activity was higher under  
493 water deficit (Fig. 3b). Under water deficit, plants supplied with 100%  $\text{NO}_3^-$   
494 showed higher root GSNOR activity than those under 70%  $\text{NO}_3^-$  (Fig. 3d). Non-  
495 significant differences were found in leaf SNO concentration while varying  $\text{NO}_3^-$   
496 supply (Fig. 3e). However, the lowest root S-nitrosothiols (SNO) concentration  
497 was observed in plants supplied with 100%  $\text{NO}_3^-$  under water deficit (Fig. 3f).

498

#### 499 *Antioxidant metabolism*

500

501 Plants supplied with less  $\text{NO}_3^-$  presented higher leaf  $[\text{O}_2^{\bullet-}]$  when  
502 compared to ones supplied with 100%  $\text{NO}_3^-$  under water deficit (Fig. 4a). When  
503 plants faced water deficit, the highest root  $[\text{H}_2\text{O}_2]$  was found under 70%  $\text{NO}_3^-$



504 supply (Fig. 4d). Although showing higher accumulation of  $O_2^{\cdot-}$  and  $H_2O_2$  in  
505 leaves and roots, plants supplied with 70%  $NO_3^-$  did not show higher MDA  
506 content than those under 100%  $NO_3^-$  (Fig. 4e,f).

507 At the maximum water deficit, the highest superoxide dismutase (SOD)  
508 activity was observed in roots supplied with 100%  $NO_3^-$  (Fig. 5b), with no  
509 differences in leaf SOD activity due to changes in  $NO_3^-$  supply (Fig. 5a). Root  
510 catalase activity was not changed by  $NO_3^-$  supply and water deficit (Fig. 5f), but  
511 plants supplied with 100%  $NO_3^-$  showed higher leaf catalase and root ascorbate  
512 peroxidase activities under water deficit (Fig. 5e,d).

513

#### 514 *Intracellular NO synthesis*

515

516 When plants were facing low water availability, the intracellular NO was  
517 increased in both leaves and roots (Fig. 6). However, roots receiving 100%  
518  $NO_3^-$  exhibited higher NO production than those supplied with 70%  $NO_3^-$  (Fig.  
519 6b). Such a response did not occur in leaves (Fig. 6a).

520

#### 521 *Plant growth*

522

523 The root dry mass of plants supplied with 70%  $NO_3^-$  was significantly  
524 reduced under water deficit (Fig. 7b). In addition, the lowest values for shoot dry  
525 mass (Fig. 7a) and leaf area (Fig. 7c) were found in plants supplied with less  
526  $NO_3^-$  under low water availability.

527

#### 528 *Experiment II: Offsetting the benefits of NO synthesis induced by $NO_3^-$ supply*

529

530 cPTIO – a NO scavenger – was sprayed on roots supplied with 100%  
531  $NO_3^-$  and facing water deficit. As consequence, the intracellular NO synthesis  
532 was reduced in leaves and roots (Fig. 8a,b) and plants showed lower  
533 photosynthetic rates and stomatal conductance under water deficit as compared  
534 to ones not sprayed with cPTIO (Fig. 9a,b). As found in experiment I, plants  
535 presented decreases in root dry mass due to water deficit when cPTIO was  
536 sprayed (Fig. 9d; Suppl. Fig. S2).

537

538 **Discussion**

539

540 *Nitrate supply stimulates root NO production, improving photosynthesis and*  
541 *antioxidant metabolism of sugarcane under water deficit*

542

543 Our findings revealed that nitrate reductase is an important enzymatic  
544 pathway for NO synthesis and also that sugarcane plants supplied with 100%  
545  $\text{NO}_3^-$  presented enhancement of drought tolerance. Here, we found higher  $\text{NO}_3^-$   
546 accumulation in roots under water deficit and receiving only  $\text{NO}_3^-$  as source of  
547 nitrogen (Fig. 2b), which caused higher  $\text{NO}_2^-$  production when compared to  
548 roots exposed to 70%  $\text{NO}_3^-$  and 30%  $\text{NH}_4^+$  (Fig. 2b,d). Such findings are  
549 supported by higher root nitrate reductase activity (Fig. 3b), which reduces  $\text{NO}_3^-$   
550 to  $\text{NO}_2^-$  during the N assimilation pathway (Heidari *et al.*, 2011). As an  
551 alternative reaction, nitrate reductase may also reduce  $\text{NO}_2^-$  to NO (Fancy *et*  
552 *al.*, 2016). In fact, the highest NO synthesis was found in roots under water  
553 deficit and supplied with only  $\text{NO}_3^-$  (Fig. 6b) and it is known that  $\text{NO}_3^-$  and  $\text{NO}_2^-$   
554 play a key role in NO synthesis through nitrate reductase (Vanin *et al.*, 2004;  
555 Yamasaki, 2005; Sun *et al.*, 2015). In *Physcomitrella patens*, low nitrate  
556 reductase activity was associated with drastic reductions in NO synthesis,  
557 further evidence that nitrate reductase is an important pathway for NO  
558 production in plants (Andrés *et al.*, 2015). It is worth noting that NO synthesis is  
559 low under non-limiting conditions, even in plants supplied with only  $\text{NO}_3^-$  (Fig.  
560 6). In general, increases in NO synthesis are expected under stressful  
561 conditions, when  $\text{NO}_2^-$  accumulation occurs (Mur *et al.*, 2012).

562 In the last decades, rapidly increasing evidence has indicated NO as an  
563 important player in plant responses to environmental constraining conditions by  
564 inducing the antioxidant defenses (Hatamzadeh *et al.*, 2015; Silveira *et al.*,  
565 2017b). During cell detoxification,  $\text{O}_2^{\bullet-}$  is dismuted to  $\text{H}_2\text{O}_2$  by superoxide  
566 dismutase, which is rapidly eliminated by catalase and ascorbate peroxidase,  
567 producing  $\text{H}_2\text{O}$  and  $\text{O}_2$  (Lázaro *et al.*, 2013). Here, we observed higher  
568 superoxide dismutase activity in roots under water deficit and supplied with  
569 100%  $\text{NO}_3^-$  (Fig. 5b), with root  $[\text{O}_2^{\bullet-}]$  remaining similar among treatments (Fig.  
570 4b). Interestingly, there was lower  $\text{O}_2^{\bullet-}$  accumulation in leaves under water  
571 deficit and supplied with only  $\text{NO}_3^-$  (Fig. 4a), even with superoxide dismutase

572 showing similar activity to the one found in plants supplied with 70%  $\text{NO}_3^-$  and  
573 30%  $\text{NH}_4^+$  (Fig. 5a). As a possible explanation, such low leaf  $[\text{O}_2^{\bullet-}]$  may be  
574 related to the interaction of this radical with NO, which generates peroxynitrite  
575 ( $\text{ONOO}^-$ ) and adds a nitro group to tyrosine residues – a process known as  
576 tyrosine nitration (Begara-Morales *et al.*, 2014; Wulff *et al.*, 2009). Although  
577 tyrosine nitration was originally considered as indicative of stress conditions,  
578 recent evidence suggests its role in cell signaling (Mengel *et al.*, 2013).

579 Root  $[\text{H}_2\text{O}_2]$  was lower in plants under water deficit that received 100%  
580  $\text{NO}_3^-$  as compared to ones supplied with 70%  $\text{NO}_3^-$  and 30%  $\text{NH}_4^+$  (Fig. 4d),  
581 indicating an efficient detoxification through increased root ascorbate  
582 peroxidase activity (Fig. 5d). In fact, the activation of antioxidant mechanisms to  
583 maintain ROS homeostasis often involves NO (Hatamzadeh *et al.*, 2015;  
584 Silveira *et al.*, 2015). Many reports show that exogenous NO improves abiotic  
585 stress tolerance, causing decreases in  $[\text{H}_2\text{O}_2]$  and lipid peroxidation (Gross *et al.*  
586 *et al.*, 2013). Exogenous NO supply inhibits ROS accumulation in many plant  
587 species under stress conditions (Verma *et al.*, 2013), such as cucumber and  
588 rice under drought (Farooq *et al.*, 2009). Sugarcane plants supplied with GSNO  
589 – a NO donor – showed increases in the activity of antioxidant enzymes, such  
590 as superoxide dismutase in leaves and catalase in roots under water deficit  
591 (Silveira *et al.*, 2017b). In addition, the S-nitrosylation has a role in mediating  
592 the interplay between NO and other reactive signaling mechanisms, such as  
593 those involving ROS. For instance, S-nitrosylation of RBOHD causes its  
594 inactivation and thus reduces ROS formation through this pathway (Yu *et al.*,  
595 2012). Such findings revealed that NO has an important role in controlling  
596 endogenous ROS levels.

597 Higher superoxide dismutase and ascorbate peroxidase in roots facing  
598 water deficit and receiving only  $\text{NO}_3^-$  (Fig. 5b,d) may be a consequence of S-  
599 nitrosylation. In pea (*Pisum sativum*), S-nitrosylation increased the activity of  
600 cytosolic ascorbate peroxidase (Begara-Morales *et al.*, 2014). However, we  
601 noticed higher levels of S-nitrosothiols (SNOs) in roots under water deficit and  
602 supplied with  $\text{NO}_3^-$  and  $\text{NH}_4^+$  (Fig. 3f). At this point, one should consider that  
603 NO-mediated post-translational modifications on target proteins may be positive  
604 or negative (Nabi *et al.*, 2019). Some of these modifications may alter signaling  
605 pathways mediated by other ROS (Holzmeister *et al.*, 2014). According to Clark

606 *et al.* (2000), S-nitrosylation can inhibit catalase activity, which implies that low  
607 level of S-nitrosylation can increase catalase activity during stress conditions,  
608 thus increasing ROS detoxification. In this way, higher [SNO] found in plants  
609 that received less nitrate (Fig. 3e,f) is associated with changes in the antioxidant  
610 system that lead to increases in leaf  $[O_2^{\bullet-}]$  and root  $[H_2O_2]$  (Fig. 4a,d). It has  
611 been proposed that S-nitrosylation can regulate  $[H_2O_2]$  in plants, controlling both  
612 the antioxidant defense system and the ROS-producing enzymes (Ortega-  
613 Galisteo *et al.*, 2012; Yu *et al.*, 2012).

614 Here, we found low accumulation of SNOs and high GSNOR activity in  
615 roots under water deficit that received 100%  $NO_3^-$  (Fig. 3f,d). GSNOR can break  
616 down GSNO – a SNO, reducing GSNO levels and consequently decreasing the  
617 total cellular level of S-nitrosylation (Feechan *et al.*, 2005). Thus, it indirectly  
618 controls the overall SNOs within cells (Feechan *et al.*, 2005), suggesting that  
619 GSNOR may be crucial in regulating the cellular SNO pool. In fact, increases in  
620 GSNOR activity contributed to the reduction of S-nitrosylation in pea plants  
621 under salt stress (Camejo *et al.*, 2013). As GSNO is an NO donor, we can  
622 argue that increases in root GSNOR activity under water deficit and supplied  
623 with only  $NO_3^-$  (Fig. 3d) are related to the reduction of GSNO levels and linked  
624 to high NO synthesis in roots (Fig. 6b). High levels of reactive nitrogen species  
625 (RNS) may be harmful to plants (Nabi *et al.*, 2019) and the absence of GSNOR  
626 activity in plants results in a significant increase in levels of SNOs and  
627 impairment of plant immunity (Feechan *et al.*, 2005), plant growth and  
628 development (Kwon *et al.*, 2012). Gong *et al.* (2015) demonstrated that absence  
629 of GSNOR activity increased the sensitivity of *Solanum lycopersicum* to alkaline  
630 stress due to the excessive accumulation of NO and SNOs, causing higher  
631 levels of endogenous S-nitrosylation and turning stomata insensitive to ABA.

632 Stomatal closure is the primary response of plants to water deficit,  
633 reducing the  $CO_2$  supply for photosynthesis and then decreasing biomass  
634 production (Machado *et al.*, 2009; Ribeiro *et al.*, 2013). Although water deficit  
635 had reduced the stomatal conductance, higher  $NO_3^-$  supply alleviated such  
636 negative effects (Fig. 1b). Due to higher stomatal conductance, sugarcane  
637 plants supplied with 100%  $NO_3^-$  showed an improvement in photosynthesis  
638 under water deficit (Fig. 1a). By integrating  $CO_2$  assimilation throughout the  
639 experimental period, plants supplied with only  $NO_3^-$  fixed about 1.5 times more

640 carbon than those supplied with  $\text{NO}_3^-$  and  $\text{NH}_4^+$ . Such a response was also  
641 related to improvement of primary photochemistry, with plants showing higher  
642 conversion of light energy into chemical energy at the PSII level (Fig. 1c).

643 Under water deficit, plants supplied with 70%  $\text{NO}_3^-$  and 30%  $\text{NH}_4^+$   
644 presented reduced root biomass as compared to those supplied with 100%  
645  $\text{NO}_3^-$ , which were not affected by low water availability (Fig. 7b). Such increase  
646 in root growth was associated with higher NO content (Fig. 6b), as found by  
647 Silveira *et al.* (2016). At maximum water deficit, high NO synthesis was found in  
648 the root meristematic zone of plants supplied with 100%  $\text{NO}_3^-$  (Suppl. Fig. S3).  
649 Several reports indicate that NO is involved in the regulation of root growth and  
650 developmental processes (Correa-Aragunde *et al.*, 2004; Lombardo and  
651 Lamattina, 2012; Sun *et al.*, 2015). The root system is able to perceive low  
652 water availability and to produce chemical signals that regulate the water flow  
653 from roots to shoots. NO is one of those chemical signals that stimulates root  
654 expansion and development (Xu *et al.*, 2017; Silveira *et al.*, 2016). Given the  
655 effects of NO on root growth, it is reasonable to assume a potential influence of  
656 NO mediating auxin signaling in roots. Correa-Aragunde *et al.* (2006)  
657 demonstrated that auxin-dependent cell cycle gene regulation was dependent  
658 on NO during lateral root formation in tomato plants. NO also modulates the  
659 auxin response during adventitious root formation in cucumber plants  
660 (Pagnussat *et al.*, 2002) and *Arabidopsis thaliana* (Lombardo *et al.*, 2006).

661 Overall, increases in NO content can trigger root development and  
662 improve water uptake, reducing the impact of low water availability on leaf water  
663 status and allowing higher stomatal conductance and photosynthesis, as  
664 noticed herein and also by Silveira *et al.* (2017). The novelty here is that we  
665 were able to induce NO synthesis in sugarcane plants by changing the nitrogen  
666 source. Such a finding has a practical consequence for sugarcane in the field as  
667 endogenous NO synthesis can be stimulated by increasing  $\text{NO}_3^-$  supply. Apart  
668 from economic issues, our data give insights on how stress tolerance can be  
669 managed by common practices in agricultural systems and further development  
670 on this technique should be carried out with field-grown plants, where  
671 interactions among nutrients, soil-root interactions and soil nitrogen dynamics  
672 determine plant performance.

673

674 *Is sugarcane performance under water deficit really improved by NO?*

675

676         Herein, we used 2-(4-carboxyphenyl)-4,4,5,5-tetramethylimidazoline-1-  
677 oxyl-3-oxide (cPTIO) – an endogenous NO scavenger (Akaike and Maeda,  
678 1996) – to check if benefits induced by increasing NO<sub>3</sub><sup>-</sup> supply were related to  
679 NO. cPTIO drastically reduced the DAF-2DA in plants under water deficit,  
680 indicating lower NO accumulation in both leaves and roots (Fig. 8a,b). As  
681 consequence, plants showed even lower stomatal conductance and  
682 photosynthesis when compared to plants under water deficit and not supplied  
683 with cPTIO (Fig. 9a,b). cPTIO sprays also reduced root growth (Fig. 9d), as  
684 found previously (Fig. 7b). Taken together, our data clearly show that the  
685 improved performance of sugarcane plants supplied with only NO<sub>3</sub><sup>-</sup> were due to  
686 stimulation of NO synthesis under water deficit.

687

## 688 **Conclusion**

689

690         Sugarcane plants grown in nutrient solution containing only NO<sub>3</sub><sup>-</sup> as  
691 nitrogen source were more tolerant to water deficit and this response was  
692 associated with increased NO production and high nitrate reductase activity in  
693 roots. Herein, increasing NO<sub>3</sub><sup>-</sup> supply was enough to stimulate NO synthesis  
694 and alleviate the effects of water deficit on sugarcane plants by increasing the  
695 activity of antioxidant enzymes, photosynthesis, stomatal conductance and root  
696 growth. From a broad perspective, our data show that supplying more NO<sub>3</sub><sup>-</sup>  
697 during nitrogen fertilization may improve sugarcane tolerance and be beneficial  
698 to field-grown sugarcane.

699

700

701 **Supplementary data**

702

703 **Fig. S1.** Activity and immunoblots of phosphoenolpyruvate carboxylase and  
704 ribulose-1,5-bisphosphate carboxylase/oxygenase in sugarcane plants under  
705 water deficit.

706 **Fig. S2.** Visual aspect of sugarcane plants under water deficit after NO  
707 scavenging through cPTIO spraying.

708 **Fig. S3.** Intracellular NO synthesis in apical sections of sugarcane roots.

709

710 **Acknowledgments**

711

712 MDP and ABS acknowledge the scholarship provided by the São Paulo  
713 Research Foundation (FAPESP, Brazil; Grant numbers 2017/11279-7,  
714 2018/08194-2). NMS acknowledges the fellowship granted by the National  
715 Program of Post-Doctorate (PNPD), Agency for the Specialization of Higher  
716 Education Personnel (Capes, Brazil). ECM, LS, ABS and RVR acknowledge the  
717 fellowships granted by the National Council for Scientific and Technological  
718 Development (CNPq, Brazil). MTP acknowledges the PhD fellowship granted by  
719 the São Paulo Research Foundation (FAPESP, Brazil; Grant number  
720 201705029-8). ABS acknowledges the grant provided by the National Council  
721 for Scientific and Technological Development (CNPq, Brazil; Grant number  
722 404815/2018-9). The authors are also very grateful to the National Institute of  
723 Science and Technology of Photonics applied to Cell Biology (INFABIC) for  
724 guiding our analyses with the confocal microscope.



## References

- Akaike T, Maeda H.** 1996. Quantitation of nitric oxide using 2-phenyl-4, 4, 5, 5-tetramethylimidazoline-1-oxyl 3-oxide (PTIO). *Methods in Enzymology* **268**, 211-221.
- Albertos P, Romero-Puertas MC, Tatematsu K, Mateos I, Sánchez-Vicente I, Nambara E, Lorenzo O.** 2015. S-nitrosylation triggers ABI5 degradation to promote seed germination and seedling growth. *Nature Communications* **6**, 8669.
- Alderton WK, Cooper CE, Knowles RG.** 2001. Nitric Oxide Synthases: structure, function and inhibition. *Biochemistry Journal* **357**, 593-615.
- Alexieva V, Sergiev I, Mapelli S, Karanov E.** 2001. The effect of drought and ultraviolet radiation on growth and stress markers in pea and wheat. *Plant, Cell and Environment* **24**, 1337-1344.
- Andrés RM, Peralta AS, Vázquez JPS, Mendivil SN, Cabrera JAP, Torres MES, Dubrovsky JG, Ruan VL.** 2015. The nitric oxide production in the moss *Physcomitrella patens* is mediated by nitrate reductase. *PloS One* **10**, e0119400.
- Arasimowicz-Jelonek M, Floryszak-Wieczorek J, Kubiś J.** 2009. Involvement of nitric oxide in water stress-induced responses of cucumber roots. *Plant Science* **177**, 682-90.
- Astier J, Kulik A, Koen E, Besson-Bard A, Bourque S, Jeandroz S, Lamotte O, Wendehenne D.** 2012. Protein S-nitrosylation: what's going on in plants? *Free Radical Biology and Medicine* **53**, 1101-1110.
- Barreto RF, Cruz FJR, Gaion LA, Prado RM, Carvalho RF.** 2018. Accompanying ions of ammonium sources and nitrate: ammonium ratios in tomato plants. *Journal of Plant Nutrition and Soil Science* **181**, 382-7.
- Begara-Morales JC, Sánchez-Calvo B, Chaki M, Valderrama R, Mata-Pérez C, Jaramillo-López J, Padilla MN, Carreras A, Corpas FJ, Barroso JB.** 2014. Dual regulation of cytosolic ascorbate peroxidase (APX) by tyrosine nitration and S-nitrosylation. *Journal of Experimental Botany* **65**, 527-538.
- Bialeski RL, Turner NA.** 1966. Separation and estimation of amino acids in crude plant extracts by thin-layer electrophoresis and chromatography. *Analytical Biochemistry* **17**, 278-293.



- Bogdan C.** 2015. Nitric oxide synthase in innate and adaptive immunity: an update. *Trends in Immunology* **36**, 161-78.
- Boschiero BN, Mariano E, Azevedo RA, Trivelin PC.** 2019. Influence of nitrate-ammonium ratio on the growth, nutrition, and metabolism of sugarcane. *Plant Physiology and Biochemistry* **139**, 246-55.
- Boveris A.** 1984. Determination of the production of superoxide radicals and hydrogen peroxide in mitochondria. In *Methods in enzymology* **105**, 429-435.
- Bradford MN.** 1976. A rapid and sensitive method for the quantitation of microgram quantities of protein utilizing the principle of protein dye binding. *Analytical Biochemistry* **72**, 248-254.
- Bright J, Hiscoc SJ, James PE, Hancock JT.** 2009. Pollen generates nitric oxide and nitrite: a possible link to pollen-induced allergic responses. *Plant Physiology and Biochemistry* **47**, 49-55.
- Cai W, Liu W, Wang WS, Fu ZW, Han TT, Lu YT.** 2015. Overexpression of rat neurons nitric oxide synthase in rice enhances drought and salt tolerance. *PLoS One* **10**, e0131599.
- Cakmak I, Horst WJ.** 1991. Effect of aluminium on lipid peroxidation, superoxide dismutase, catalase, and peroxidase activities in root tips of soybean (*Glycine max*). *Physiologia Plantarum* **83**, 463-468.
- Cambraia J, Pimenta JA, Estevao MM, Sant'Anna R.** 1989. Aluminum effects on nitrate uptake and reduction in sorghum. *Journal of Plant Nutrition* **12**, 1435-45.
- Camejo D, Romero-Puertas MdelC, Rodríguez-Serrano M, Sandalio LM, Lázaro JJ, Jiménez A, Sevilla F.** 2013. Salinity-induced changes in S-nitrosylation of pea mitochondrial proteins. *Journal of Proteomics* **79**, 87-99.
- Cánovas D, Marcos JF, Marcos AT, Strauss J.** 2016. Nitric oxide in fungi: is there NO light at the end of the tunnel? *Current Genetics* **62**, 513-8.
- Cataldo JM, Haroom M, Schrader LE, Youngs VL.** 1975. Rapid calorimetric determination of nitrate in plant tissue by nitration of salicylic acid. *Communications in Soil Science and Plant Analysis* **6**, 71-80.
- Chamizo-Ampudia A, Sanz-Luque E, Llamas A, Galvan A, Fernandez E.** 2017. Nitrate reductase regulates plant nitric oxide homeostasis. *Trends in Plant Science* **22**, 163-174.

- Clark D, Durner J, Navarre DA, Klessig DF.** 2000. Nitric oxide inhibition of tobacco catalase and ascorbate peroxidase. *Molecular Plant-Microbe Interactions* **13**, 1380-1384.
- Correa-Aragunde N, Graziano M, Lamattina L.** 2004. Nitric oxide plays a central role in determining lateral root development in tomato. *Planta* **218**, 900-905.
- Correa-Aragunde N, Graziano M, Chevalier C, Lamattina L.** 2006. Nitric oxide modulates the expression of cell cycle regulatory genes during lateral root formation in tomato. *Journal of Experimental Botany* **57**, 581-588.
- Crane BR, Sudhamsu J, Patel BA.** 2010. Bacterial nitric oxide synthases. *Annual Review of Biochemistry* **79**, 445-70.
- De Armas R, Valadier MH, Champigny ML, Lamaze T.** 1992. Influence of ammonium and nitrate on the growth and photosynthesis of sugarcane. *Journal of Plant Physiology* **140**, 531-535.
- Degl'Innocenti E, Guide L, Soldatini GF.** 2002. Effect of chronic O<sub>3</sub> fumigation on the activity of some Calvin cycle enzymes in two poplar clones. *Photosynthetica* **40**, 121-126.
- Desikan R, Griffiths R, Hancock JT, Neill S.** 2002. A new role for an old enzyme: nitrate reductase-mediated nitric oxide generation is required for abscisic acid-induced stomatal closure in *Arabidopsis thaliana*. *Proceedings of the National Academy of Sciences of the U. S. A.* **99**, 16314-16318.
- Esteban R, Ariz I, Cruz C, Moran JF.** 2016. Mechanisms of ammonium toxicity and the quest for tolerance. *Plant Science* **248**, 92-101.
- Fancy NN, Bahlmann AK, Loake GJ.** 2016. Nitric oxide function in plant abiotic stress. *Plant, Cell and Environment* **40**, 462-472.
- Farooq M, Basra SMA, Wahid A, Rehman H.** 2009. Exogenously applied nitric oxide enhances the drought tolerance in fine grain aromatic rice (*Oryza sativa* L.). *Journal of Agronomy and Crop Science* **195**, 254-261.
- Fatma M, Masood A, Per TS, Khan NA.** 2016. Nitric oxide alleviates salt stress inhibited photosynthetic response by interacting with sulfur assimilation in mustard. *Frontiers in Plant Science* **7**, 521.
- Feechan A, Kwon E, Yuri B, Wang Y, Pallas J, Loake G.** 2005. A central role for S-nitrosothiols in plant disease resistance. *Proceedings of the National Academy of Sciences* **102**, 8054-8059.

- Fernandez-Marcos M, Sanz L, Lewis DR, Muday GK, Lorenzo O.** 2011. Nitric oxide causes root apical meristem defects and growth inhibition while reducing PIN-FORMED1 (PIN1)-dependent acropetal auxin transport. *Proceedings of the National Academy of Sciences of the U. S. A.* **108**, 18506-18511.
- Frechilla S, Lasa B, Ibarretxe L, Lamsfus C, Aparicio-Tejo P.** 2001. Pea responses to saline stress is affected by the source of nitrogen nutrition (ammonium or nitrate). *Plant Growth Regulation* **35**, 171-9.
- García-Mata C, Lamattina L.** 2001. Nitric oxide induces stomatal closure and enhances the adaptive plant responses against drought stress. *Plant Physiology* **126**, 1196-1204.
- Giannopolitis C N, Ries SK.** 1977. Superoxide dismutase: Occurrence in higher plants. *Plant Physiology* **59**, 309-314.
- Gong B, Wen D, Wang X, Wei M, Yang F, Li Y, Shi Q.** 2015. S-nitrosoglutathione reductase modulated redox signaling controls sodic alkaline stress responses in *Solanum lycopersicum L.* *Plant and Cell Physiology* **1**, 790-802.
- Gross F, Durner J, Gaupels F.** 2013. Nitric oxide, antioxidants and prooxidants in plant defence responses. *Frontiers in Plant Science* **4**, 419.
- Gupta KJ, Fernie AR, Kaiser WM, Dongen JTV.** 2011. On the origins of nitric oxide. *Trends in Plant Science* **16**, 160-168.
- Hageman RH, Reed AJ.** 1980. Nitrate reductase from higher plants. *Methods in Enzymology* **69**, 270-280.
- Hancock JT, Neill SJ.** 2014. NO synthase in plants? *CAB Reviews* **9**, 1-9.
- Hancock JT, Neill SJ.** 2019. Nitric Oxide: Its generation and interactions with other reactive signaling compounds. *Plants* **8**, 41.
- Hatamzadeh A, Molaahmad Nalouisi A, Ghasemnezhad M, Biglouei MH.** 2015. The potential of nitric oxide for reducing oxidative damage induced by drought stress in two turf grass species, creeping bent grass and tall fescue. *Grass and Forage Science* **70**, 538-548.
- Havir EA, McHale NA.** 1987. Biochemical and developmental characterization of multiple forms of catalase in tobacco leaves. *Plant Physiology* **84**, 450-455.
- He Y, Tang RH, Hao Y, Stevens RD, Cook CW, Ahn SM, Jing L, Yang Z, Chen L, Guo F.** 2004. Nitric oxide represses the *Arabidopsis* floral transition. *Science* **305**, 1968-1971.

- Heath RL, Packer L.** 1968. Photoperoxidation in isolated chloroplast. I. kinetics and stoichiometry of fatty acid peroxidation. *Archives of Biochemistry and Biophysics* **125**, 189-198.
- Heidari B, Matre P, Nemie-Feyissa D, Meyer C, Rognli OA, Moller SG, Lillo C.** 2011. Protein phosphatase 2A B55 and A regulatory subunits interact with nitrate reductase and are essential for nitrate reductase activation. *Plant Physiology* **156**, 165-72.
- Holzmeister C, Gaupels F, Geerlof A, Sarioglu H, Sattler M, Durner J, Lindermayr C.** 2014. Differential inhibition of *Arabidopsis* superoxide dismutases by peroxynitrite-mediated tyrosine nitration. *Journal of Experimental Botany* **66**, 989-99.
- Jahnová J, Luhová L, Petřivalský M.** 2019. S-nitrosoglutathione reductase - the master regulator of protein S-nitrosation in plant no signaling. *Plants* **8**, 48.
- Jamaux I, Steinmetz A, Belhassen E.** 1997. Looking for molecular and physiological markers of osmotic adjustment in sunflower. *New Phytologist* **137**, 117-127.
- Kwon E, Feechan A, Yun BW, Hwang BH, Pallas JA, Kang JG, Loake GJ.** 2012. AtGSNOR1 function is required for multiple developmental programs in *Arabidopsis*. *Planta* **236**, 887-900.
- Laemmli UK.** 1970. Cleavage of structural proteins during the assembly of the head of bacteriophage T4. *Nature* **227**, 680-685.
- Lázaro JJ, Jiménez A, Camejo D, Martí MC, Lázaro-Payo A, Barranco-Medina S, Sevilla F.** 2013. Dissecting the integrative antioxidant and redox systems in plant mitochondria. Effect of stress and S-nitrosylation. *Frontiers in plant science* **4**, 460.
- León J, Costa-Broseta Á.** 2019. Present knowledge and controversies, deficiencies, and misconceptions on nitric oxide synthesis, sensing, and signaling in plants. *Plant, Cell and Environment* **1**, 15.
- Lombardo MC, Graziano M, Polacco JC, Lamattina L.** 2006. Nitric oxide functions as a positive regulator of root hair development. *Plant Signaling and Behavior* **1**, 28-33.
- Lombardo MC, Lamattina L.** 2012. Nitric oxide is essential for vesicle formation and trafficking in *Arabidopsis* root hair growth. *Journal of Experimental Botany* **63**, 4875-4885.

**Machado RS, Ribeiro RV, Marchiori PER, Machado DFSP, Machado EC, Landell MGDA.** 2009. Biometric and physiological responses to water deficit in sugarcane at different phenological stages. *Pesquisa Agropecuária Brasileira* **44**, 1575-1582.

**Malagoli M, Dal Canal A, Quaggiotti S, Pegoraro P, Bottacin A.** 2000. Differences in nitrate and ammonium uptake between Scots pine and European larch. *Plant and Soil* **221**, 1-3.

**McCullough H.** 1967. The determination of ammonia in whole blood by a direct colorimetric method. *Clinica Chimica Acta* **17**, 297-304.

**Mengel A, Chaki M, Shekariesfahlan A, Lidermayr C.** 2013. Effect of nitric oxide on gene transcription – S-nitrosylation of nuclear proteins. *Frontiers in Plant Science* **4**, 293.

**Meng S, Su L, Li Y, Wang Y, Zhang C, Zhao Z.** 2016. Nitrate and ammonium contribute to the distinct nitrogen metabolism of *Populus simonii* during moderate salt stress. *PloS One* **11**, e0150354.

**Meyer JH, Schumann AW, Wood RA, Nixon DJ, Van Den Berg M.** 2007. Recent advances to improve nitrogen use efficiency of sugarcane in the South African sugar industry. In *Proceedings of the International Society of Sugar Cane Technologists* **26**, 238-246.

**Mohammadi M, Karr AL.** 2001. Superoxide anion generation in effective and ineffective soybean root nodules. *Journal of Plant Physiology* **158**, 1023-1029.

**Moreau M, Lindermayr C, Durner J, Klessig D.** 2010. NO synthesis and signaling in plants – where do we stand? *Physiologia Plantarum* **138**, 372-383.

**Mur LA, Sivakumaran A, Mandon J, Cristescu SM, Harren FJ, Hebelstrup KH.** 2012. Haemoglobin modulates salicylate and jasmonate/ethylene-mediated resistance mechanisms against pathogens. *Journal of Experimental Botany* **63**, 4375-4387.

**Mur LA, Mandon J, Persijn S, Cristescu SM, Moshkov IE, Novikova GV, Hall MA, Harren FJM, Hebelstrup KH, Gupta KJ.** 2013. Nitric oxide in plants: an assessment of the current state of knowledge. *AoB Plants* **5**, pls052.

**Nabi RBS, Tayade R, Hussain A, Kulkarni KP, Imran QM, Mun BG, Yun BW.** 2019. Nitric oxide regulates plant responses to drought, salinity, and heavy metal stress. *Environmental and Experimental Botany* **161**, 120-133.

- Nakano Y, Asada K.** 1981. Hydrogen peroxide is scavenged by ascorbate-specific peroxidases in spinach chloroplasts. *Plant and Cell Physiology* **22**, 867-880.
- Ortega-Galisteo AP, Serrano MR, Pazmiño DM, Gupta DK, Sandalio LM, Puertas MCR.** 2012. S-Nitrosylated protein sinpea (*Pisum sativum* L.) leaf peroxisomes: changes under abiotic stress. *Journal of Experimental Botany* **63**, 2089-2103.
- Pagnussat GC, Simontacchi M, Puntarulo S, Lamattina L.** 2002. Nitric oxide is required for root organogenesis. *Plant Physiology* **129**, 954-6.
- Peixoto PHP, Cambraia J, Sant'ana R, Mosquim PR, Moreira MA.** 1999. Aluminum effects on lipid peroxidation and on activities of enzymes of oxidative metabolism in sorghum. *Revista Brasileira de Fisiologia Vegetal* **11**, 137-143.
- Pissolato MD, Silveira NM, Machado EC, Zambrosi FCB, Sodek L, Ribeiro RV.** 2019. Photosynthesis and biomass accumulation in young sugarcane plants grown under increasing ammonium supply in nutrient solution. *Theoretical and Experimental Plant Physiology* **31**, 401-11.
- Reid CD, Tissue DT, Fiscus EL, Strain BR.** 1997. Comparison of spectrophotometric and radio isotopic methods for the assay of Rubisco in ozone-treated plants. *Physiologia Plantarum* **101**, 398-404.
- Ribeiro RV, Machado RS, Machado EC, Machado DFSP, Magalhães Filho JR, Landell MGA.** 2013. Revealing drought-resistance and productive patterns in sugarcane genotypes by evaluating both physiological responses and stalk yield. *Experimental Agriculture* **49**, 212-224.
- Rios-Gonzalez K, Erdei L, Lips SH.** 2002. The activity of antioxidant enzymes in maize and sunflower seedlings as affected by salinity and different nitrogen sources. *Plant Science* **162**, 923-30.
- Robinson N, Brackin R, Vinall K, Soper F, Holst J, Gamage H, Paungfoo-Lonhienne C, Rennenberg H, Lakshmanan P, Schmidt S.** 2011. Nitrate paradigm does not hold up for sugarcane. *PloS One* **6**, e19045.
- Rockel P, Strube F, Rockel A, Wildt J, Kaiser WM.** 2002. Regulation of nitric oxide (NO) production by plant nitrate reductase *in vivo* and *in vitro*. *Journal of Experimental Botany* **53**, 103-110.

- Rodríguez-Ruiz M, Mito P, Palma JM, Corpas FJ.** 2017. S-nitrosoglutathione reductase (GSNOR) activity is down-regulated during pepper (*Capsicum annuum* L.) fruit ripening. *Nitric Oxide* **68**, 51-55.
- Sage RF, Sharkey TD, Seemann JR.** 1988. The in vivo response of the ribulose-1,5-bisphosphate carboxylase activation state and the pool sizes of photosynthetic metabolites to elevated CO<sub>2</sub> in *Phaseolus vulgaris* L. *Planta* **174**, 407-416.
- Santolini J, André F, Jeandroz S, Wendehenne D.** 2017. Nitric oxide synthase in plants: Where do we stand? *Nitric Oxide* **63**, 30-38.
- Santos MC, Seabra AB, Pelegriño MT, Haddad os.** 2016. Synthesis, characterization and cytotoxicity of glutathione-and PEG-glutathione-superparamagnetic iron oxide nanoparticles for nitric oxide delivery. *Applied Surface Science* **367**, 26-35.
- Shan C, Zhou Y, Liu M.** 2015. Nitric oxide participates in the regulation of the ascorbate-glutathione cycle by exogenous jasmonic acid in the leaves of wheat seedlings under drought stress. *Protoplasma* **252**, 1397-1405.
- Shi H, Ye T, Zhu JK, Chan Z.** 2014. Constitutive production of nitric oxide leads to enhanced drought stress resistance and extensive transcriptional reprogramming in *Arabidopsis*. *Journal of Experimental Botany* **65**, 4119-4131.
- Silveira NM, de Oliveira JA, Ribeiro C, Canatto RA, Siman L, Cambraia J, Farnese F.** 2015. Nitric oxide attenuates oxidative stress induced by arsenic in lettuce (*Lactuca sativa*) leaves. *Water, Air and Soil Pollution* **226**, 379.
- Silveira NM, Frungillo L, Marcos FC, Pelegriño MT, Miranda MT, Seabra AB, Salgado I, Machado EC, Ribeiro RV.** 2016. Exogenous nitric oxide improves sugarcane growth and photosynthesis under water deficit. *Planta* **244**, 181-190.
- Silveira NM, Hancock JT, Frungillo L, Siasou, E, Marcos FC, Salgado I, Machado EC, Ribeiro RV.** 2017a. Evidence towards the involvement of nitric oxide in drought tolerance of sugarcane. *Plant Physiology and Biochemistry* **115**, 354-359.
- Silveira NM, Marcos FC, Frungillo L, Moura BB, Seabra AB, Salgado I, Machado EC, Hancock JT, Ribeiro RV.** 2017b. S-nitrosoglutathione spraying improves stomatal conductance, Rubisco activity and antioxidant defense in



both leaves and roots of sugarcane plants under water deficit. *Physiologia Plantarum* **160**, 383-395.

**Speer M, Brune A, Kaiser WM.** 1994. Replacement of nitrate by ammonium as the nitrogen source increases the salt sensitivity of pea plants. I. Ion concentrations in roots and leaves. *Plant, Cell and Environment* **17**, 1215-1221.

**Sun H, Li J, Song W, Tao J, Huang S, Chen S, Hou M, Xu G, Zhang Y.** 2015. Nitric oxide generated by nitrate reductase increases nitrogen uptake capacity by inducing lateral root formation and inorganic nitrogen uptake under partial nitrate nutrition in rice. *Journal of Experimental Botany* **66**, 2449-59.

**Towbin H, Staehelin T, Gordon J.** 1979. Electrophoretic transfer of proteins from polyacrylamide gels to nitrocellulose sheets: procedure and some applications. *Proceedings of the National Academy of Science U. S. A.* **76**, 4350-4356.

**Vanin AF, Svistunenko DA, Mikoyan VD, Serezhenkov VA, Fryer MJ, Baker NR, Cooper CE.** 2004. Endogenous superoxide production and the nitrite/nitrate ratio control the concentration of bioavailable free nitric oxide in leaves. *Journal of Biological Chemistry* **279**, 24100-24107.

**Verma K, Mehta SK, Shekhawat GS.** 2013. Nitric oxide (NO) counteracts cadmium induced cytotoxic processes mediated by reactive oxygen species (ROS) in *Brassica juncea*: cross-talk between ROS, NO and antioxidant responses. *Biometals* **26**, 255-269.

**Wang L, Macko SA.** 2011. Constrained preferences in nitrogen uptake across plant species and environments. *Plant, cell and Environment* **34**, 525-34.

**Wang P, Du Y, Hou YJ, Zhao Y, Hsu CC, Yuan F, Zhu X, Tao WA, Song CP, Zhu JK.** 2015. Nitric oxide negatively regulates abscisic acid signaling in guard cells by S-nitrosylation of OST1. *Proceedings of the National Academy of Science U. S. A.* **112**, 613-618.

**Wulff A, Oliveira HC, Saviani EE, Salgado I.** 2009. Nitrite reduction and superoxide-dependent nitric oxide degradation by *Arabidopsis* mitochondria: influence of external NAD(P)H dehydrogenases and alternative oxidase in the control of nitric oxide levels. *Nitric Oxide* **21**, 132-139.

**Xu XT, Jin X, Liao WB, Dawuda MM, Li XP, Wang M, Niu LJ, Ren PJ, Zhu YC.** 2017. Nitric oxide is involved in ethylene-induced adventitious root



development in cucumber (*Cucumis sativus* L.) explants. *Scientia Horticulturae* **215**, 65-71.

**Yamasaki H, Sakihama Y, Takahashi S.** 1999. An alternative pathway for nitric oxide production in plants: new features of an old enzyme. *Trends in Plant Science* **4**, 128-129.

**Yamasaki H.** 2005. The NO world for plants: achieving balance in an open system. *Plant, Cell and Environment* **28**, 78-84.

**Yu M, Yun BW, Spoel SH, Loake GJ.** 2012. A sleigh ride through the SNO: Regulation of plant immune function by protein S-nitrosylation. *Current Opinion in Plant Biology* **15**, 424-430.

**Zhang X, Cardoso L, Broderick M, Fein H, Davies IR.** 2000. Novel calibration method for nitric oxide microsensors by stoichiometrical generation of nitric oxide from SNAP. *Electroanalysis* **12**, 425-428.

**Zhang L, Zhai Y, Li Y, Zhao YO, Lv L, Gao M, Liu J, Hu J.** 2012. Effects of nitrogen forms and drought stress on growth, photosynthesis and some physico-chemical properties of stem juice of two maize cultivars (*Zea mays* L.) at elongation stage. *Pakistan Journal Botany* **44**, 1405-1412.

## Figures captions

**Figure 1.** Leaf CO<sub>2</sub> assimilation ( $A_n$ , in a), stomatal conductance ( $g_s$ , in b), effective quantum efficiency of PSII ( $\Phi_{PSII}$ , in c) and leaf relative water content (RWC, in d) in sugarcane plants maintained well-hydrated (ref, white symbols and bars) or subjected to water deficit (WD, black symbols and gray bars) and supplied with varying NO<sub>3</sub><sup>-</sup>:NH<sub>4</sub><sup>+</sup> ratios: 100:0 and 70:30. The white area indicates the period of water deficit and the shaded area indicates the period of recovery. Symbols and bars represent the mean value of four replications  $\pm$  se. Asterisks indicate significant differences between treatments under water deficit and different letters indicate statistical difference among treatments (Tukey test,  $p < 0.05$ ).

**Figure 2.** Concentration of nitrate (a and b), nitrite (c and d) and ammonium (e and f) in leaves (a, c and e) and roots (b, d and f) of sugarcane plants maintained well-hydrated (reference, white bars) or subjected to water deficit (gray bars) and supplied with varying NO<sub>3</sub><sup>-</sup>:NH<sub>4</sub><sup>+</sup> ratios: 100:0 and 70:30. The white area indicates the period of water deficit and the shaded area indicates the period of recovery. Bars represent the mean value of four replications  $\pm$  se. Different letters indicate statistical difference among treatments (Tukey test,  $p < 0.05$ ).

**Figure 3.** Nitrate reductase activity (NR, in a and b), S-nitrosoglutathione reductase activity (GSNOR, in c and d) and S-nitrosothiol concentration (SNO, in e and f) in leaves (a, c and e) and roots (b, d and f) of sugarcane plants maintained well-hydrated (reference, white bars) or subjected to water deficit (gray bars) and supplied with varying NO<sub>3</sub><sup>-</sup>:NH<sub>4</sub><sup>+</sup> ratios: 100:0 and 70:30. The white area indicates the period of water deficit and the shaded area indicates the period of recovery. Bars represent the mean value of four replications  $\pm$  se. Different letters indicate statistical difference among treatments (Tukey test,  $p < 0.05$ ).

**Figure 4.** Concentration of superoxide anion ( $O_2^{\cdot-}$ , a and b), hydrogen peroxide ( $H_2O_2$ , c and d) and malondialdehyde (MDA, in e and f) in leaves (a, c and e) and roots (b, d and f) of sugarcane plants maintained well-hydrated (reference, white bars) or subjected to water deficit (gray bars) and supplied with varying  $NO_3^-:NH_4^+$  ratios: 100:0 and 70:30. The white area indicates the period of water deficit and the shaded area indicates the period of recovery. Bars represent the mean value of four replications  $\pm$  se. Different letters indicate statistical difference among treatments (Tukey test,  $p < 0.05$ ).

**Figure 5.** Superoxide dismutase activity (SOD, in a and b), ascorbate peroxidase activity (APX, in c and d) and catalase activity (CAT, in e and f) in leaves (a, c and e) and roots (b, d and f) of sugarcane plants maintained well-hydrated (reference, white bars) or subjected to water deficit (gray bars) and supplied with varying  $NO_3^-:NH_4^+$  ratios: 100:0 and 70:30. The white area indicates the period of water deficit and the shaded area indicates the period of recovery. Bars represent the mean value of four replications  $\pm$  se. Different letters indicate statistical difference among treatments (Tukey test,  $p < 0.05$ ).

**Figure 6.** Confocal microscopy images showing intracellular NO synthesis in leaves (a) and roots (b) of sugarcane plants maintained well-hydrated (reference, white bars) or subjected to water deficit (gray bars) and supplied with varying  $NO_3^-:NH_4^+$  ratios: 100:0 and 70:30. Mean pixel intensities are also shown. Bars represent the mean value of four replications  $\pm$  se. Different letters indicate statistical difference among treatments (Tukey test,  $p < 0.05$ ).

**Figure 7.** Shoot (SDM, in a) and root (RDM, in b) dry mass and leaf area (LA, in c) of sugarcane plants maintained well-hydrated (reference, white bars) or subjected to water deficit (gray bars) and supplied with varying  $NO_3^-:NH_4^+$  ratios: 100:0 and 70:30. Bars represent the mean value of four replications  $\pm$  se. Different letters indicate statistical difference among treatments (Tukey test,  $p < 0.05$ ).

**Figure 8.** Confocal microscopy images showing intracellular NO synthesis in leaves (a) and roots (b) of sugarcane plants supplied with only  $\text{NO}_3^-$  (100:0  $\text{NO}_3^-:\text{NH}_4^+$ ) and maintained well-hydrated (reference, white bars), subjected to water deficit (WD, gray bars) and subjected to water deficit and sprayed with cPTIO (WD+cPTIO, gray striped bars). Mean pixel intensities are also shown. Bars represent the mean value of four replications  $\pm$  se. Different letters indicate statistical difference among treatments (Tukey test,  $p < 0.05$ ).

**Figure 9.** Leaf  $\text{CO}_2$  assimilation ( $A_n$ , in a), stomatal conductance ( $g_s$ , in b), shoot (SDM, in c) and root (RDM, in d) dry mass and leaf area (LA, in e) of sugarcane plants supplied with only  $\text{NO}_3^-$  (100:0  $\text{NO}_3^-:\text{NH}_4^+$ ) and maintained well-hydrated (reference, white symbols and bars), subjected to water deficit (WD, black symbols and gray bars) and subjected to water deficit and sprayed with cPTIO (WD+cPTIO, crossed symbols and gray striped bars). Asterisks indicate significant differences between treatments under water deficit (a and b) and different letters indicate statistical difference among treatments (c-e) by the Tukey test ( $p < 0.05$ ).

**Fig. 1**

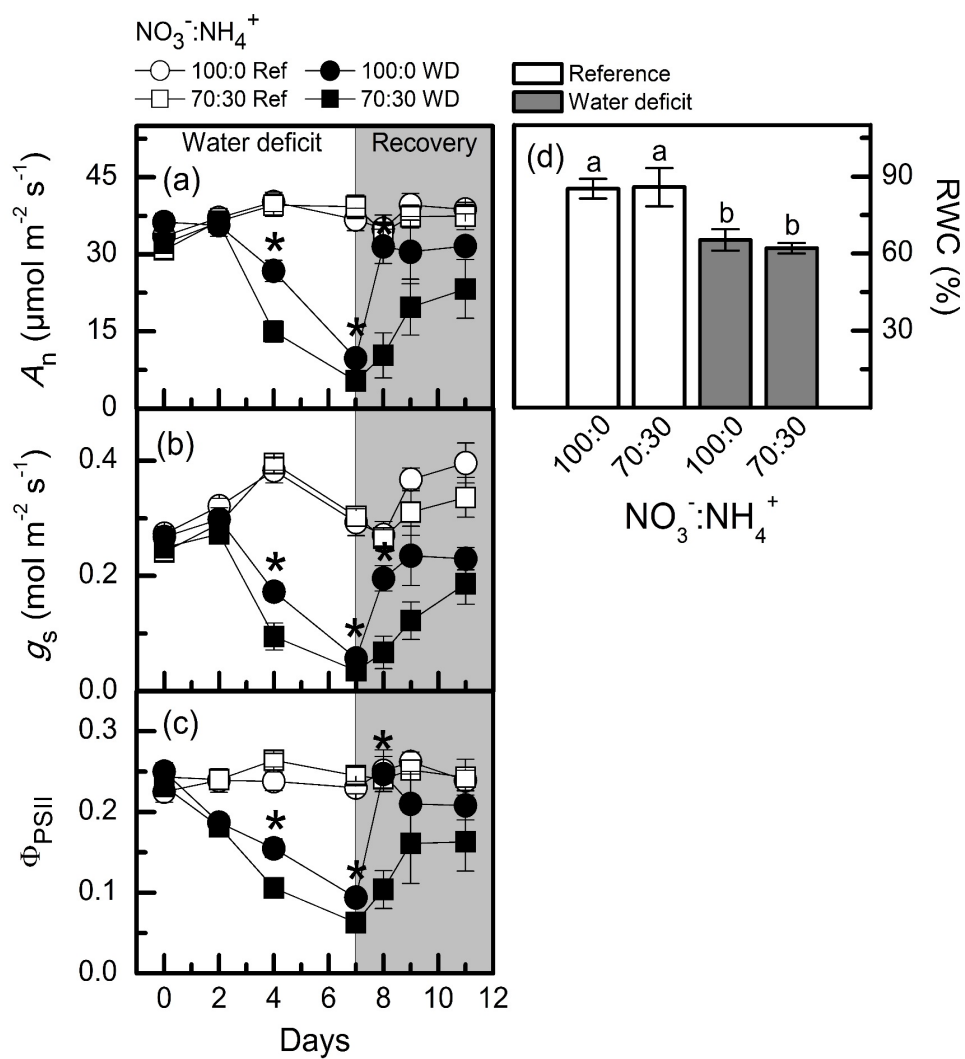

**Fig. 2**

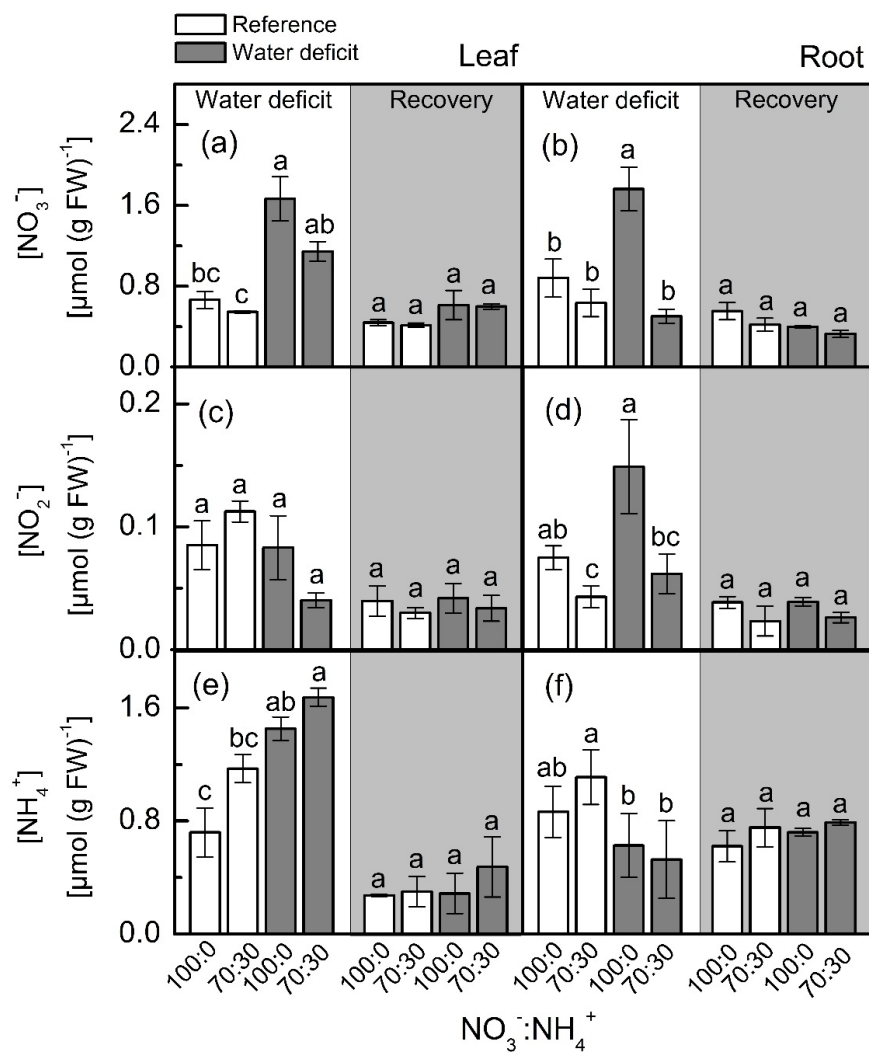

**Fig. 3**

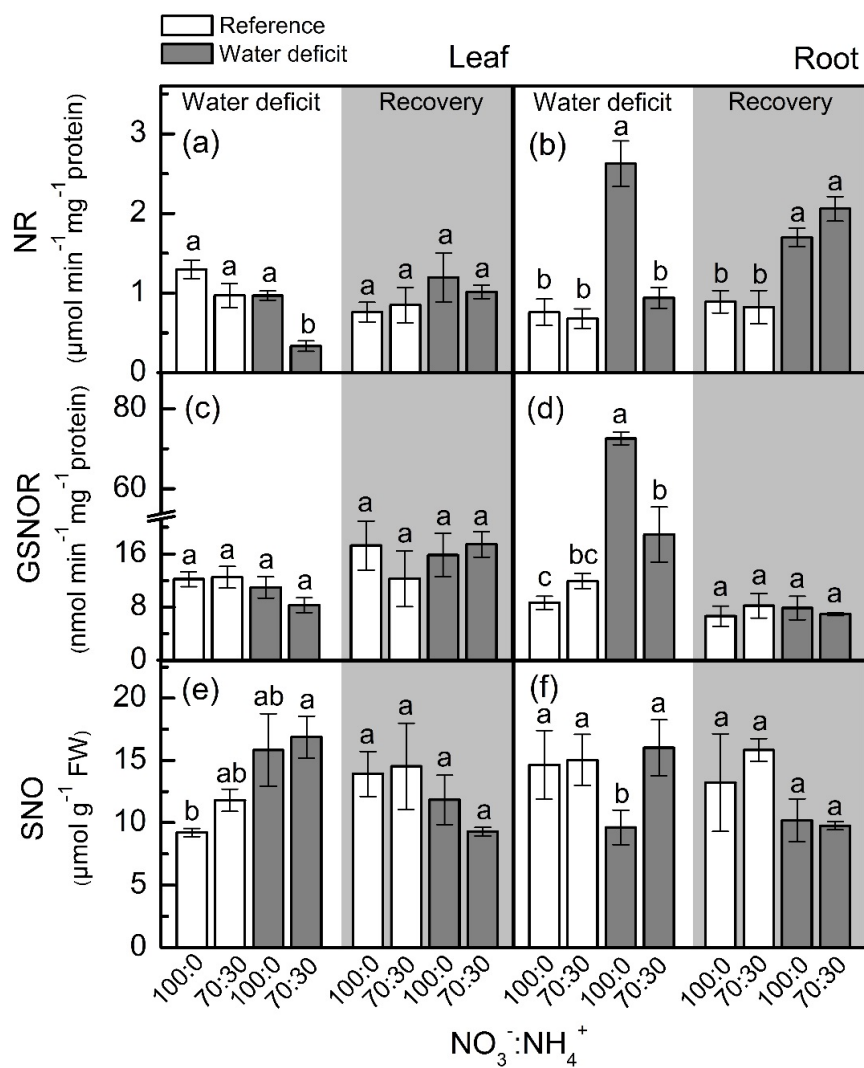

**Fig. 4**

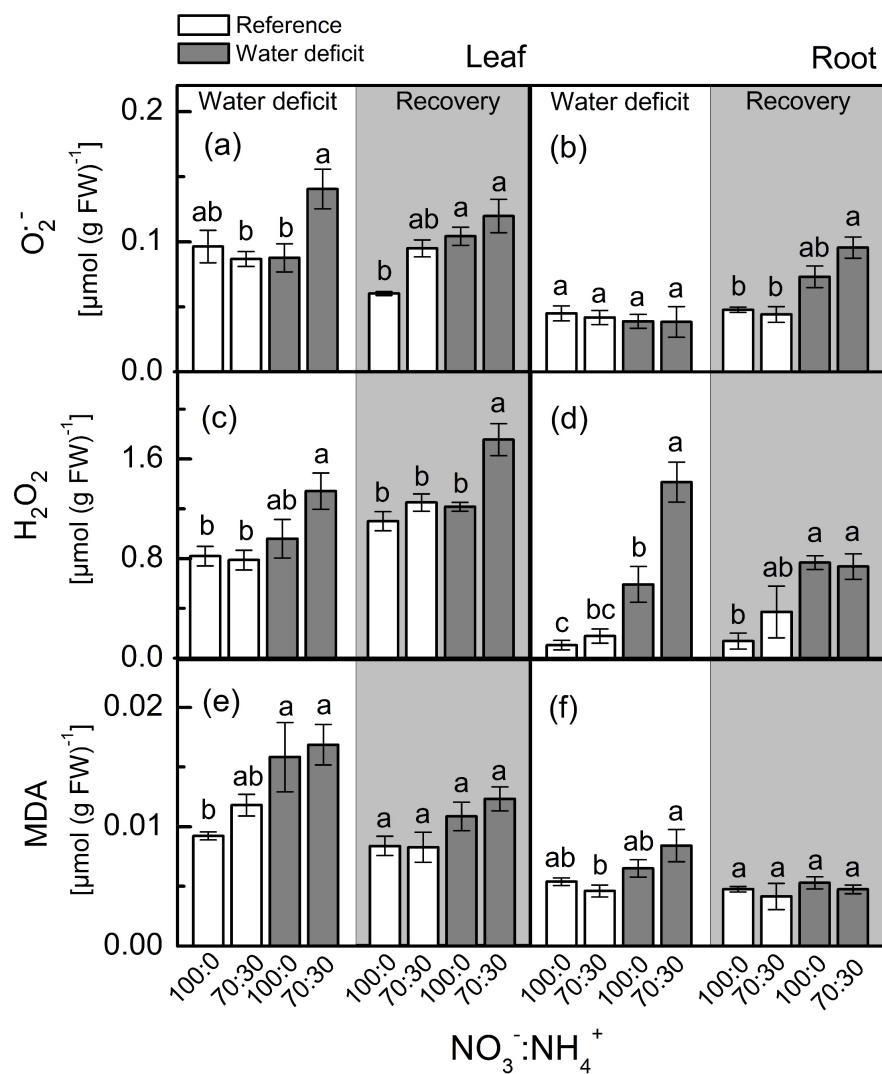



**Fig. 5**

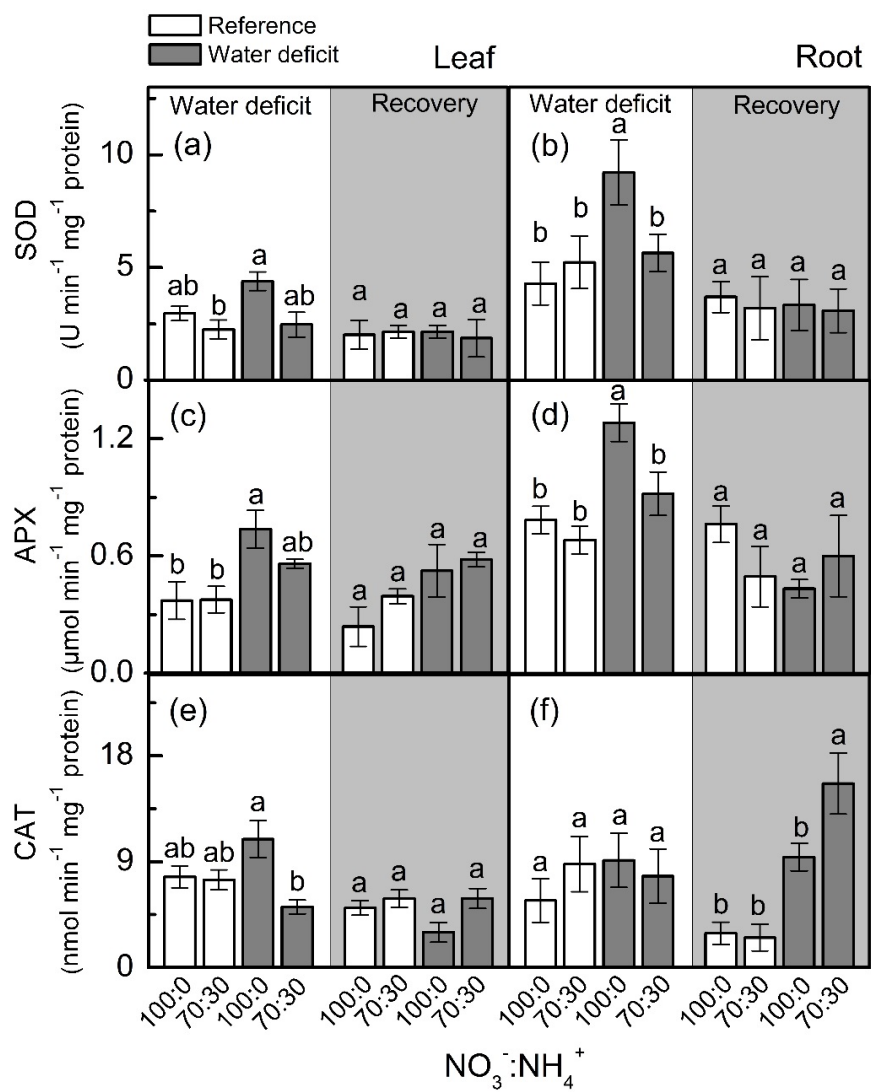

**Fig. 6**

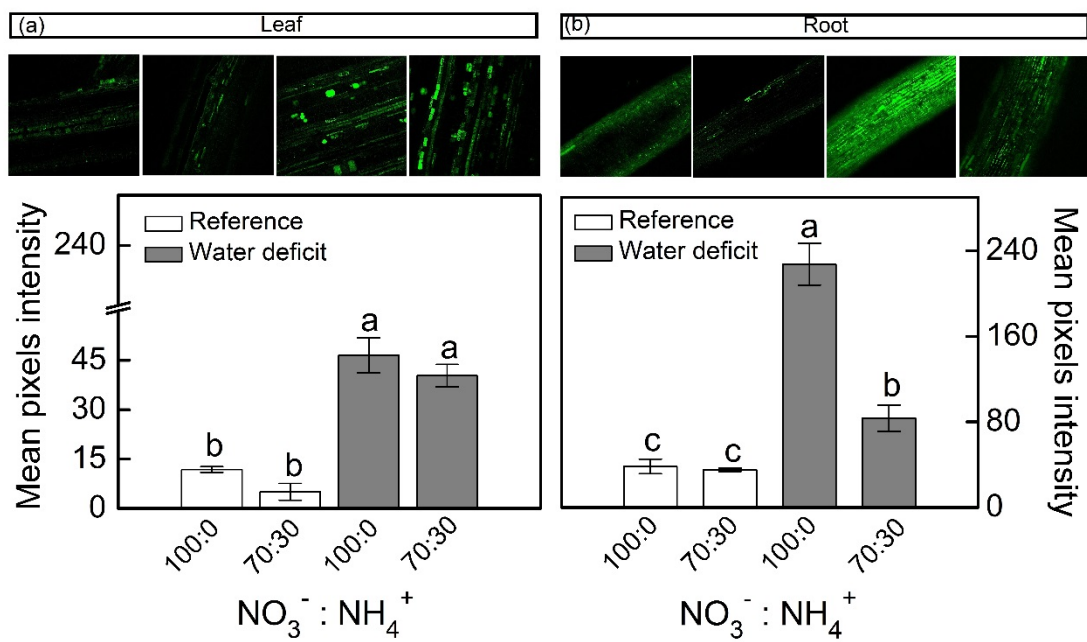

**Fig. 7**

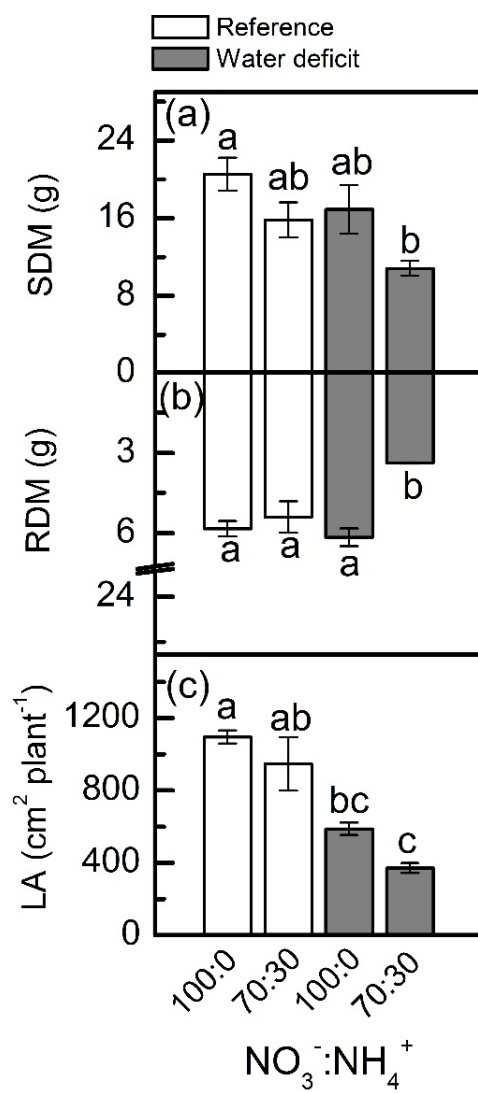

**Fig. 8**

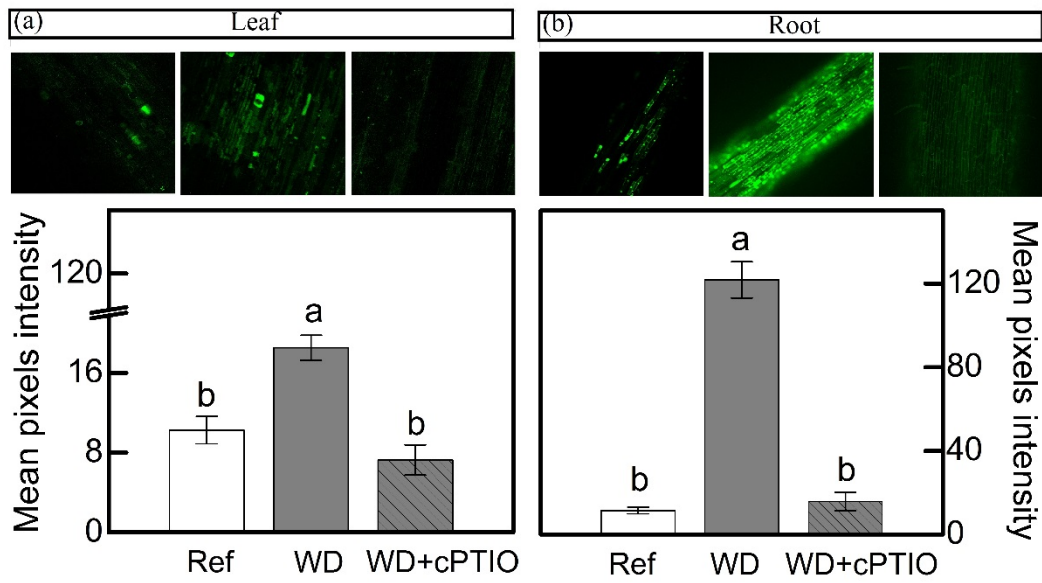

**Fig. 9**

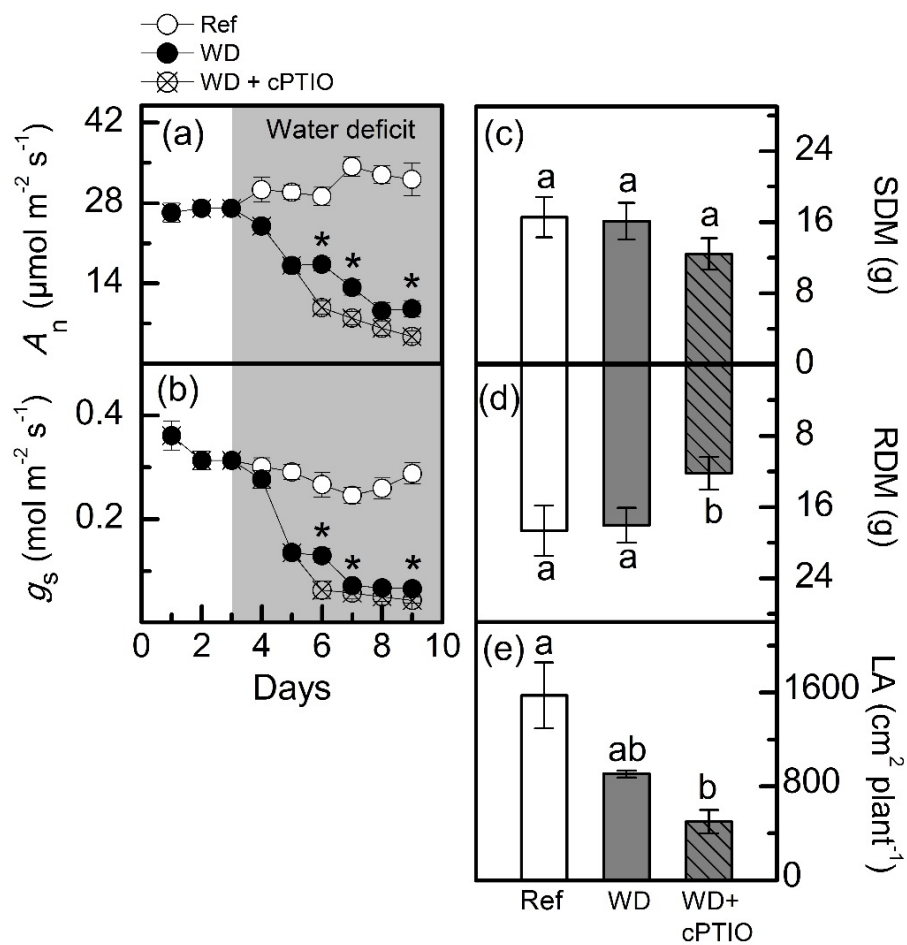

Source: https://www.biorxiv.org/content/10.1101/860544v1.full.pdf
